# 1 **Expansion and differentiation of *ex vivo* cultured erythroblasts in** 2 **scalable stirred bioreactors**

3

4 Joan Sebastián Gallego-Murillo<sup>1,2</sup>, Giulia Iacono<sup>1</sup>, Luuk A.M. van der Wielen<sup>2,3</sup>, Emile van den Akker<sup>1</sup>, Marieke von  
5 Lindern<sup>1,\*</sup>, Sebastian Aljoscha Wahl<sup>2,+,\*</sup>

6

7 <sup>1</sup> Department of Hematopoiesis, Sanquin Research and Landsteiner Laboratory, Amsterdam UMC, Amsterdam, The  
8 Netherlands;

9 <sup>2</sup> Department of Biotechnology, Faculty of Applied Sciences, Delft University of Technology, Delft, The Netherlands;

10 <sup>3</sup> Bernal Institute, University of Limerick, Limerick, Republic of Ireland.

11 <sup>+</sup> current address: Institute of Bioprocess Engineering, Friedrich-Alexander University Erlangen-Nürnberg, Paul-Gordan-  
12 Str. 3, 91052 Erlangen, Germany

13 \* These authors share responsibility for the manuscript.

14

15 **Corresponding author:** Marieke von Lindern, Department of Hematopoiesis, Sanquin Research and Landsteiner  
16 Laboratory, Amsterdam UMC, Plesmanlaan 125, 1066CX Amsterdam, The Netherlands; e-mail:  
17 [m.vonlindern@sanquin.nl](mailto:m.vonlindern@sanquin.nl).

## 18 **Abstract**

19 Transfusion of donor-derived red blood cells (RBCs) is the most common form of cell therapy. Production of transfusion-  
20 ready cultured RBCs (cRBCs) is a promising replacement for the current fully donor-dependent therapy. However, very  
21 large number of cells are required for transfusion. Here we scale-up cRBC production from static cultures to 0.5 L stirred  
22 tank bioreactors, and identify the effect of operating conditions on the efficiency of the process. Oxygen requirement of  
23 proliferating erythroblasts (0.55-2.01 pg/cell/h) required sparging of air to maintain the dissolved oxygen concentration  
24 at the tested setpoint (2.88 mg O<sub>2</sub>/L). Erythroblasts could be cultured at dissolved oxygen concentrations as low as 0.7 O<sub>2</sub>  
25 mg/mL without negative impact on proliferation, viability or differentiation dynamics. Stirring speeds of up to 600 rpm  
26 supported erythroblast proliferation, while 1800 rpm led to a transient halt in growth and accelerated differentiation  
27 followed by a recovery after 5 days of culture. Erythroblasts could also be differentiated in bioreactors, with final  
28 enucleation levels and hemoglobin content similar to parallel cultures under static conditions. After defining optimal  
29 mixing and aeration strategies, erythroblast proliferation cultures were successfully scaled up to 3 L bioreactors.

30

## 31 **Keywords**

32 Cultured blood, erythropoiesis, red blood cell, stirred tank bioreactor, cellular therapy, cell culture, scale-up.

## 33 **Introduction**

34 Blood transfusion is the most common cell therapy to this date. Worldwide about 120 million blood donations are  
35 collected; nevertheless, availability of blood products for transfusion purposes is not uniformly distributed, with current  
36 shortages localized mostly in low-income countries (World Health Organization, 2021). Globalization and an increasing  
37 multiethnicity are societal factors that prompt for a larger, more diverse blood supply to ensure a safe transfusion practice  
38 (Klinkenberg et al., 2019; Vichinsky et al., 1990). Currently, over 360 blood group antigens are known, being part of  
39 more than 35 known blood group systems (Daniels, 2013). Finally, donor-dependent transfusion products harbor a risk  
40 for novel bloodborne pathogens that escape current screening programs.

41 Production of cultured red blood cells (cRBCs) represents a potentially unlimited source of RBCs for transfusion  
42 purposes, offering a better control on the quality and safety of the final product. Fully matched cRBCs could be used for  
43 patients that have developed alloimmunization or with rare blood groups (Pellegrin et al., 2021; Peyrard et al., 2011).  
44 Furthermore, cRBCs loaded with therapeutics or engineered to present antigens in their surface could be used as a highly  
45 efficient drug-delivery system (Koleva et al., 2020; Sun et al., 2017; Vichinsky et al., 1990; X. Zhang et al., 2021).

46 Current *ex vivo* RBC culture protocols start with the commitment of CD34<sup>+</sup> hematopoietic stem cells (HSCs) to the  
47 erythroid lineage, which is characterized by high expression of the transferrin receptor (CD71). This is followed by the  
48 proliferation of early erythroblasts expressing glycophorin A (CD235a<sup>dim</sup>) and integrin- $\alpha$ 4 (CD49d<sup>dim-to-high</sup>) together with  
49 CD71<sup>high</sup>. Finally, the cells mature into CD235<sup>high</sup>/CD49d<sup>+</sup>/CD71<sup>-</sup> enucleated reticulocytes. Erythropoietin (Epo) is  
50 required throughout erythropoiesis for cell survival and proliferation, whereas stem cell factor (SCF) promotes the  
51 proliferation capacity (Heshusius et al., 2019; Migliaccio et al., 2002). The addition of glucocorticoids enhances  
52 proliferation of early erythroblasts and arrests differentiation. As a result, withdrawal of glucocorticoids and SCF allows  
53 for synchronous differentiation (Leberbauer et al., 2005; von Lindern et al., 1999).

54 Erythroid cells are commonly cultured in static dishes or flasks, in which spatial inhomogeneities in nutrient  
55 concentrations occur due to settling of cells to the bottom of the vessels. Moreover, this cultivation system is susceptible  
56 to mass transfer limitations as transfer of oxygen to the culture is fully diffusion-dependent (Peniche Silva et al., 2020;  
57 Place et al., 2017; Sugiura et al., 2011). This type of culture systems would culminate in impractical numbers of  
58 dishes/flasks (currently about 9.000 - 12.000 T175 flasks for a single transfusion unit) (Timmins & Nielsen, 2009, 2011).

59 The use of a static culture system in which oxygen transfer is facilitated by a gas-permeable membrane at the bottom of  
60 the vessel enabled a 50-fold increase in surface cell density (cells per cm<sup>2</sup>) compared to culture dishes (Heshusius et al.,  
61 2019). Nevertheless, scale up of this culture protocol is still by area, and limited control on culture conditions can be  
62 performed.

63 Cultivation systems mimicking the microstructure and microenvironment of the bone marrow (BM) niche were developed  
64 for cRBC production. Hollow fiber bioreactors enable tissue-like cell concentrations with continuous perfusion of fresh  
65 nutrients and dissolved oxygen (Allenby et al., 2019; Housler et al., 2012). Microcarriers and porous scaffolds are used,  
66 both under static (Severn et al., 2016, 2019) and agitated conditions (Lee et al., 2015). These biomimetic systems support  
67 high erythroblast cell densities. However, scale-up is hampered by gradients in nutrient concentrations along and across  
68 hollow fibers (Mohebbi-Kalhari et al., 2012; Piret et al., 1991) or inside microcarriers (Preissmann et al., 1997; Yu, 2012).

69 Active agitation of RBC cultures increases nutrient homogeneity and oxygen transfer. This includes roller bottles (Y.  
70 Zhang et al., 2017), rocking motion bioreactors (Boehm et al., 2010; Timmins et al., 2011), shake flasks (Aglialoro et al.,  
71 2021; Sivalingam et al., 2020), and spinner flasks (Griffiths et al., 2012; Kupzig et al., 2017; Sivalingam et al., 2020;  
72 Trakarnsanga et al., 2017). Stirred tank reactors (STRs) additionally allow for online monitoring and control of process  
73 parameters such as pH, dissolved oxygen and nutrient concentrations. STRs are commonly used for suspension cultures  
74 of different mammalian cells such as CHO, HEK293, hybridoma or Vero cell lines (Chu & Robinson, 2001; Rodrigues  
75 et al., 2010; Tapia et al., 2016), reaching volumes of up to ~20.000 L at an industrial scale (Farid, 2007). This type of  
76 reactors can be combined with cell retention systems, such as spin filters or external filtration systems, allowing for  
77 continuous culture processes with higher cell densities (Avgerinos et al., 1990; Karst et al., 2016).

78 For cRBCs, STRs were used in small scale cultures (Han et al., 2021; Lee et al., 2018; Ratcliffe et al., 2012, 2012), or in  
79 an attempt to scale-up production (Law & Gilbert, 2021). Some studies report a large increase in cell numbers, but the  
80 conditions that were used varied widely with respect to medium composition, cell density, oxygenation, agitation  
81 (impeller type, speed), and nutrient feeding strategy, making a direct comparison to other cultivation systems challenging  
82 (Bayley et al., 2017; Han et al., 2021).

83 Shear stress is a relevant parameter in scale-up. Hydrodynamic conditions in the BM microenvironment, dominated by  
84 slow perfusion of nutrients and low fluid shear stress ( $0.29 \pm 0.27$  Pa in sinusoidal capillaries), are different to those of  
85 STRs in which complex patterns of fluid flow take place (Bixel et al., 2017; Mazo et al., 1998). The impact of shear stress  
86 on cultures seems to be cell-line dependent, affecting cell growth, viability, morphology, protein glycosylation, and

87 differentiation fate (Godoy-Silva et al., 2009; Kretzmer & Schügerl, 1991; Wolfe & Ahsan, 2013; Wu, 1999). Shear stress  
88 in rocking culture plates or upon orbital shaking in Erlenmeyer flasks reduced erythroblast viability and accelerated  
89 erythroid differentiation (Aglialoro et al., 2021; Boehm et al., 2010). Enhanced differentiation is in agreement with  
90 increased enucleation and reduced cell proliferation reported for STRs (Bayley et al., 2017).

91 The different stages of erythroid cultures show distinct sensitivity to shear stress. Immature erythroid cells responded to  
92 shear stress with low viability and increased cell fragility, whereas cultures of more mature cells were robust and showed  
93 a linear increase in enucleation through the range of tested stirring speeds (Han et al., 2021). The effect of shear stress on  
94 erythroblasts may be mediated, at least partially, by the mechanosensitive channel PIEZO1, which activates multiple  
95 calcium-dependent signaling transduction cascades including the Calcineurin-NFAT pathway, the modulation of STAT5  
96 and ERK signaling, and inside-out integrin activation (Aglialoro et al., 2020, 2021; Caulier et al., 2020).

97 Sparging air also produces shear stress in the cultures, the negative effect of which could be counteracted in cRBC cultures  
98 by antifoaming agents at the cost of a lower percentage of enucleated cells (Bayley et al., 2017). The negative effect of  
99 turbulence can be aggravated when higher stirring speeds and gas flow rates are needed upon scale-up to keep the cultures  
100 well-mixed with adequate oxygen supply (Xing et al., 2009). Nevertheless, it is still unclear if the observed negative  
101 effect of sparging on cell cultures is due to the mechanical forces generated during bubble coalescence and breakup, or  
102 by biochemical interactions between cells and air bubbles (Sobolewski et al., 2011; Walls et al., 2017; Walsh et al., 2017).

103 Oxygen availability is a critical parameter in mammalian cell cultures. Cell cultures are often performed under dissolved  
104 oxygen ( $dO_2$ ) concentrations that are higher than those *in vivo*, potentially leading to an increase in oxidative stress,  
105 decrease in growth rate, acceleration of cell differentiation, and increase in apoptosis (Mas-Bargues et al., 2019). *In vivo*,  
106 erythroblasts are exposed to the hypoxic conditions of the extravascular bone marrow niche, with a mean oxygen partial  
107 pressure of 13.3 mmHg (range: 4.8-21.1 mmHg; (Spencer et al., 2014)), equivalent to a  $dO_2$  concentration of 0.6 mg  $O_2/L$   
108 (range: 0.2-0.9 mg  $O_2/L$ ), or a 8% (range: 3%-13%) of saturation in equilibrium with air (1 atm, 37°C).

109 Low oxygen pressure in static culture conditions accelerated erythroblast differentiation, increased hemoglobin levels  
110 and the enucleation rates, and increased the expression of the hypoxia-inducible factor 1 $\alpha$  (HIF1 $\alpha$ ) (Bapat et al., 2021;  
111 Goto et al., 2019). Vlaski et al. also reported accelerated erythroid differentiation, but an increased cell yield in the first  
112 culture stage, using gas oxygen concentrations as low as 1.5% (Vlaski et al., 2009). However, it is difficult to predict the  
113 local  $dO_2$  concentrations to which cells are exposed in the culture dishes used for these experiments, as static culture  
114 systems often display  $dO_2$  gradients (Place et al., 2017). In contrast, a more homogeneous  $dO_2$  concentration can be

115 monitored and controlled in STR cultivations using in-line oxygen measurements. The effect of  $dO_2$  on enucleation and  
116 cell yields in STR erythroid cultures depends on other process parameters such as pH, temperature and shear (Han et al.,  
117 2021).

118 Oxygen requirements of erythroid cultures are dynamic during the maturation process, with cells switching between  
119 oxidative phosphorylation (OXPHOS) and glycolysis (Richard et al., 2019). Although oxygen requirements of mature  
120 RBCs are well known, there is limited data for erythroid precursors. Oxygen consumption rates for erythroblast have  
121 been estimated in Seahorse assays, ranging between 0.26 and 1.66 pg/cell/h (Caielli et al., 2021; Gonzalez-Menendez et  
122 al., 2021; Jensen et al., 2019). Erythroblast oxygen requirements in STR cultures range between 0.06 and 0.21 pg/cell/h  
123 (cell-specific oxygen consumption rate;  $q_{O_2}$ ), and go as low as 0.01-0.05 pg/cell/h in the later stages of differentiation  
124 (Bayley et al., 2017).

125 In the present study, we report the implementation of our cRBC culture protocol in stirred tank reactors. As oxygen  
126 availability was identified as a critical parameter controlling the yields of cRBCs, we estimated the oxygen requirements  
127 of proliferating erythroblasts, and evaluated the effect of dissolved oxygen and stirring speed on cell yields during  
128 erythroblast proliferation and differentiation in this culture system. Based on appropriate culture conditions identified in  
129 0.5 L STRs, we explored the scale up to 3 L STRs, maintaining the same proliferation and differentiation efficiency.

130

## 131 **Materials and methods**

### 132 **Cell culture**

133 Human adult peripheral blood mononuclear cells (PBMCs) were purified by density centrifugation using Ficoll-Paque  
134 (density = 1.077 g/mL; 600g, 30 minutes; GE Healthcare; USA). Informed written consent was given by donors to give  
135 approval for the use of waste material for research purposes, and was checked by Sanquin's NVT Committee (approval  
136 file number NVT0258; 2012) in accordance with the Declaration of Helsinki and the Sanquin Ethical Advisory Board.  
137 RBCs were cultured from PBMCs as previously described (Heshusius et al., 2019), with minor modifications: nucleosides  
138 and trace elements were omitted; cholesterol, oleic acid, and L- $\alpha$ -phosphatidylcholine were replaced by a defined lipid  
139 mix (1:1000; Sigma-Aldrich cat#L0288; USA). Expansion cultures were supplemented with erythropoietin (Epo; 2  
140 U/mL; EPREX<sup>®</sup>; Janssen-Cilag; Netherlands), human stem cell factor (hSCF; 50 ng/mL, produced in HEK293T cells),

141 dexamethasone (Dex; 1  $\mu\text{mol/L}$ ; Sigma-Aldrich), and interleukin-3 (IL-3; 1 ng/mL, first day only; Stemcell Technologies;  
142 Canada). Cell density was maintained between  $0.7\text{-}2\times 10^6$  cells/mL by daily feeding with fresh expansion medium.

143 To induce differentiation, cells were washed and reseeded at  $1\times 10^6$  cells/mL in Cellquin medium supplemented with Epo  
144 (10 U/mL), 5% Omniplasma (Octapharma GmbH; Germany), human plasma-derived holotransferrin (1 mg/mL; Sanquin;  
145 Netherlands), and heparin (5 U/mL; LEO Pharma A/S; Denmark). Cells were kept in culture for 11 days, without medium  
146 refreshment, until fully differentiated, in either stirred bioreactors or in culture dishes.

## 147 **Bioreactor and reference culture conditions**

148 All cultivations were performed on either autoclavable (MiniBio 500 mL, or 2 L single wall; glass) or single-use  
149 (AppliFlex 0.5 L, or AppliFlex 3.0 L; plastic) stirred bioreactors (Applikon Biotechnology; Netherlands). For expansion  
150 cultures, day 8-10 cell cultures from PBMCs were seeded in bioreactors at  $0.7\text{-}0.9\times 10^6$  cells/mL. The cell concentration  
151 was measured every 24 h, and partial media refreshment was performed if the measured cell density was  $>1.2\times 10^6$   
152 cells/mL, diluting the cell culture to  $0.7\times 10^6$  cells/mL. For differentiation cultures, cells were seeded at  $1\times 10^6$  cells/mL  
153 and cultured without medium additions.

154 Process control was established using PIMS Lucullus (Securecell AG; Switzerland). Cultures were agitated using a  
155 marine impeller (down-pumping) at defined stirring speeds. pH was measured using an AppliSens pH+ probe (AppliSens;  
156 Netherlands) and kept at 7.5 by sparging  $\text{CO}_2$  (acid). pH probe drift was corrected by recalibration every 2 days using an  
157 off-line pH measurement. Dissolved oxygen ( $\text{dO}_2$ ) concentration was monitored using a polarographic probe (AppliSens),  
158 and was controlled by sparging pure air using a porous sparger (average pore size = 15  $\mu\text{m}$ ).  $\text{dO}_2$  values are reported as  
159 the percentage relative to the oxygen saturation concentration in water at equilibrium with air (1 atm,  $37^\circ\text{C}$ ;  $100\% = 7.20$   
160 mg  $\text{O}_2/\text{L}$ ).

161 Unless indicated otherwise, 0.5 L STR cultures were performed keeping the working volume constant at 300 mL, with a  
162 stirring speed of 200 rpm using a marine impeller of diameter 2.8 cm, and a constant headspace flow of  $\text{N}_2$  (100 mL/min)  
163 was used during the whole cultivation to strip excess  $\text{CO}_2$  or  $\text{O}_2$  from the culture.

164 Static dish cultures (at  $37^\circ\text{C}$ , air + 5%  $\text{CO}_2$  atmosphere) were used in parallel as reference for all tested conditions, with  
165 the same inoculum, growth media and seeding/feeding regime performed as in the bioreactors.

166

## 167 **Cell characterization**

### 168 **Cell count and viability**

169 Cell density was measured in triplicate using an electrical current exclusion method at a size range of 7.5-15  $\mu\text{m}$  and 5-  
170 15  $\mu\text{m}$  in expansion and differentiation cultures, respectively (CASY Model TCC; OLS OMNI Life Science; Germany;  
171 or Z2 Coulter Counter; Beckman Coulter; Indianapolis, IN). Population fold change (FC) was calculated in reference to  
172 cell numbers at the start of the growth experiments:  $\text{FC} = N(t_{i+1})/N(t_0)$ . Viability was determined using a hemocytometer  
173 and a dye exclusion method (Trypan Blue; Sigma).

### 174 **Differentiation and viability measurements using flow cytometry**

175 About 200.000 cells were stained in HEPES buffer + 0.5% BSA (30 minutes, 4°C), measured using an BD FACSCanto™  
176 II or Accuri C6 flow cytometer (BD Biosciences), gated against specific isotypes, and analyzed using FlowJo™ (version  
177 10.3; Ashland, OR). Antibodies or reagents used were: (i) CD235a-PE (1:2500 dilution; OriGene cat#DM066R), CD49d-  
178 BV421 (1:100 dilution; BD-Biosciences cat#565277), DRAQ7 (live/dead stain; 1:200 dilution; ThermoFischer Scientific  
179 cat#D15106); (ii) CD235a-PE (1:2500 dilution; OriGene cat#DM066R), CD71-APC (1:200 dilution; Miltenyi cat#130-  
180 099-219); (iv) PI (live/dead stain; 1:2000 dilution; Invitrogen cat#P3566); (v) AnnexinV-FITC (1:1000 dilution;  
181 BioLegend cat#640906), DRAQ7 (live/dead stain; 1:200 dilution; ThermoFischer Scientific cat#D15106); (vi) DRAQ5  
182 (nuclear stain; 1:2500 dilution; abcam cat# ab108410). Stainings with panels (iv), (v) and (vi) were performed 10 minutes  
183 before analysis without intermediate washing steps.

### 184 **Cell morphology and hemoglobin content**

185 Cell pellets ( $2.5 \times 10^6$  cells, after centrifugation for 5 minutes at 600g) were washed with PBS, resuspended in PBS + 5%  
186 HSA, and smeared onto microscope slides. Slides were left to air overnight, stained with Hemacolor® Rapid Staining  
187 (Sigma), mounted with Entellan® (Merck; Germany), and examined by bright field microscopy (Leica DM5500B, Leica  
188 Microsystems, Germany). Hemoglobin content was determined using *o*-phenylenediamine as previously described  
189 (Bakker et al., 2004).

### 190 **Lactate and ammonium measurements**

191 Cell culture samples were taken daily before and after medium refreshment. After centrifugation (600g, 5 min), the  
192 supernatant was snap frozen in liquid nitrogen and stored at -80°C until further analysis. Upon thawing, lactate  
193 concentrations were measured using a RAPIDlab 1265 blood analyzer (enzymatic amperometric biosensor; Siemens



194 Healthineers, Germany). Ammonium concentration was determined via an enzymatic spectrophotometric assay (Sigma  
195 cat#AA0100). Average daily growth rate ( $\mu_{\max}$ ), doubling time ( $t_{1/2}$ ), and the cell-specific metabolite consumption or  
196 production rates ( $q_{\text{lac}}$ ,  $q_{\text{NH}_4}$ ) were calculated as described in Supplemental Methods.

## 197 **Oxygen consumption rate determination**

198 For the determination of the oxygen consumption rate of proliferating erythroblast, bioreactor cultures were run at 200  
199 rpm, with no sparging (no active pH or  $\text{dO}_2$  control), and with a fixed overhead flow of 100 mL/min air + 5%  $\text{CO}_2$  as  
200 only source of oxygen. pH was continuously monitored, and passively controlled by the equilibrium between  $\text{CO}_2$  in the  
201 overhead and the sodium bicarbonate present in the culture medium (pH variation between 7.2 and 7.7 during the  
202 cultivation). The cell-specific consumption rate of oxygen ( $q_{\text{O}_2}$ ) for each day of culture was determined by the dynamic  
203 method, fitting the measured  $\text{dO}_2$  data as described in Supplemental Methods and using the experimentally determined  
204 mass transfer coefficient of the system ( $k_{\text{La}} = 0.82$  1/h) at the culture conditions.

## 205 **Statistical analysis**

206 Statistical analyses were performed using unpaired two-tailed two-sample equal-variance Student's *t*-test. All data in  
207 figures represent the mean  $\pm$  the standard deviation of the measurements. The number of replicates is  $N=3$  for all  
208 experiments, unless indicated.

209

## 210 **Results**

### 211 **Oxygen consumption by proliferating erythroblasts**

212 To determine the feasibility of erythroblast proliferation in stirred tank bioreactors (STRs), day 9 PBMC-derived  
213 erythroblast cultures were seeded in a 2 L STR (working volume = 1 L). Cells were cultured with a stirring speed of 50  
214 rpm (marine impeller; tip speed = 118 mm/s), with air diffusion from the headspace as the sole source of oxygen for the  
215 cell culture, similarly to aeration in static culture dishes and orbital shaking (Aglialoro et al., 2021; Heshusius et al., 2019).  
216 We observed complete depletion of oxygen after 6-12 hours in the bioreactor culture, followed by a decrease in cell  
217 growth and viability compared to a parallel culture in dishes, albeit only after 24 hours (Figures 1A-C; representative  
218 experiment). Continuous sparging of air + 5%  $\text{CO}_2$  caused excessive foam production, with cell debris accumulating in  
219 foam (data not shown). Proliferation and viability were restored to levels similar or better compared to those of static

220 cultures when headspace aeration was complemented with sparging triggered when the measured dissolved oxygen ( $dO_2$ )  
221 concentration was lower than 2.88 mg  $O_2$ /L (equivalent to 40% of saturation with air; a setpoint typically used in STR  
222 mammalian cell cultures; (Jan et al., 1997; Ozturk & Palsson, 1991; Restelli et al., 2006)), (Figures 1B-C).

223 The results prompted to measure the oxygen consumption, for which smaller culture volumes were used (in standardized  
224 0.5 L bioreactors) with headspace aeration (100 mL/min of air + 5%  $CO_2$ ) and an increased stirring speed (200 rpm;  
225 marine impeller; tip speed = 293 mm/s). Day 9 expansion cultures, established from PBMCs, were measured throughout  
226 6 subsequent days of proliferation. Cell numbers were assessed daily, and cultures were diluted with fresh medium,  
227 transiently increasing the oxygen concentration (Figures 1D-E). A wide variation of  $dO_2$  was observed, going from as  
228 high as 100% of saturation after medium refreshment, to as low as 10% when high cell concentrations were reached.  
229 Oxygen was not limiting in these cultures, due to the higher mass transfer coefficient ( $k_{La} = 0.82$  1/h), and the lower total  
230 oxygen demand because of the lower culture volume. The cell-specific oxygen consumption rate ( $q_{O_2}$ ) was calculated for  
231 5 independent cultures at distinct days (Supplemental Methods) and decreased from  $2.01 \pm 0.53$  at the start of the  
232 experiment (day 9 of culture) to  $0.55 \pm 0.24$  pg/cell/h 6 days later (Figure 1F; Supplemental Figure S1). The decrease in  
233 oxygen consumption mirrored a decrease in cell proliferation (Figure 1D), possibly due to enhanced spontaneous  
234 differentiation of erythroblasts.

235 So, although headspace aeration can ensure oxygen availability in 0.5 L bioreactor cultures, a better aeration strategy is  
236 required to ensure sufficient  $O_2$  supply in cultures with increased volumes, and to evaluate the effect of defined constant  
237  $dO_2$  levels in cultured erythroblasts.

## 238 **Controlled aeration supports erythroblast expansion in stirred tank bioreactors**

239 To improve the  $dO_2$  control in 0.5 L bioreactors, we used intermittent sparging of air, combined with a continuous  
240 headspace flow of nitrogen (100 mL  $N_2$ /min) to strip excess  $O_2$  from the culture and drive  $dO_2$  to the desired setpoint  
241 (40%  $dO_2$ ) (Supplemental Figure S2A). Intermittent sparging of  $CO_2$  controlled the pH (=7.5; Supplemental Figure S2B).

242 Day 9 PBMC-derived erythroblast cultures were seeded in the bioreactors at an initial cell concentration of  $0.7 \times 10^6$   
243 cells/mL (Figure 2A). Erythroblasts seeded in culture dishes were cultured in parallel using similar medium refreshment  
244 conditions as reference.

245 The growth profile was comparable between bioreactor and static cultures, showing a 750-fold increase in cell number  
246 after 10 days of culture (resp. day 9 to day 18 counting from PBMC isolation and seeding; Figure 2B). No significant

247 difference was found between the viability of bioreactor and dish cultures (day 10 PI<sup>-</sup> events: 92.9%±1.1% in bioreactors,  
248 94.5%±0.4% in culture dishes; Figure 2C). Flow cytometry indicated that most cells were committed to the erythroid  
249 lineage at the start of the bioreactor culture (<10% CD235a<sup>+</sup>/CD71<sup>-</sup> cells; >70% CD235a<sup>+</sup>; Figure 2D; gating strategy  
250 available in Supplemental Figure S3). Although sustained proliferation of CD235a<sup>+</sup>/CD49d<sup>+</sup>/CD71<sup>high</sup> erythroblasts can  
251 be maintained in presence of EPO, hSCF and dexamethasone, some spontaneous differentiation can take place, initially  
252 leading to an increase in CD235a<sup>+</sup> cells, and a subsequent gradual decrease of CD49d and CD71 expression. Both in  
253 bioreactors and dishes the percentage of CD235a<sup>+</sup>/CD71<sup>low</sup> and CD235a<sup>+</sup>/CD49d<sup>-</sup> cells was maintained lower than 10%  
254 during the whole cultivation (Figures 2D-E). During the last 5 days of the experiment (day 14-19 after seeding PBMCs),  
255 the mean cell diameter gradually decreased (Figure 2F). Staining with AnnexinV and DRAQ7 indicated only a low  
256 percentage of apoptotic or dead cells (Supplemental Figure S3D), whereas cytopins indicated a large portion of cells  
257 with condensed nuclei (Figure 2G), indicative of spontaneous differentiation. Thus, spontaneous differentiation, rather  
258 than decreased viability, reduced the proliferative capacity of day 17-19 cultures. Importantly, this was similar between  
259 static cultures and cells cultured in bioreactors.

## 260 **Effect of dissolved oxygen concentration on erythroblast expansion cultures**

261 Standard mammalian cell culture conditions are mostly hyperoxic compared to their native *in vivo* niche, potentially  
262 leading to oxidative stress and impaired growth (Mas-Bargues et al., 2019). The 40% dO<sub>2</sub> used in our initial experiments,  
263 equivalent to 2.88 mg O<sub>2</sub>/mL, is 5-fold higher than the oxygen concentration in the bone marrow compartment in which  
264 erythroblast proliferation and differentiation takes place (0.6 mg O<sub>2</sub>/mL; (Spencer et al., 2014)). Therefore, we tested  
265 whether BM mimicking oxygen concentrations also supported erythroblast expansion. Bioreactor cultures at 10% dO<sub>2</sub>  
266 (0.72 mg O<sub>2</sub>/L) showed comparable cell yields to dish conditions (Figure 3A), while requiring lower volumes of sparged  
267 air compared to 40% dO<sub>2</sub> (Supplemental Figure S4A). A continuous decrease of growth rate, from 0.78±0.19 1/day to  
268 0.45±0.05 1/day after 8 days of culture, was observed in bioreactor cultures at 10% dO<sub>2</sub>. By contrast, in hyperoxic  
269 bioreactor cultures (dO<sub>2</sub> = 40%) the growth rate was stable at ~0.78 1/day for the first 5 days of culture, followed by a  
270 decrease to 0.38±0.12 1/day at day 8 of cultivation (Figure 3B; growth rates calculated using cell counts available in  
271 Supplemental Figure S4C).

272 Cell size also decreased faster during the culture period at 10% dO<sub>2</sub> (Figure 3C). This may indicate partial differentiation  
273 within the population of CD235a<sup>+</sup>/CD71<sup>+</sup>/CD49d<sup>+</sup> population, or a reduced protein synthesis at this lower O<sub>2</sub>  
274 concentration (Brugarolas et al., 2004). Although the percentage of CD235a<sup>+</sup>/CD49d<sup>-</sup>/CD71<sup>low</sup> cells increased during

275 culture, this was similar between bioreactors at 10% dO<sub>2</sub> and standard static cultures (Figure 3D-E). Lactate, typically  
276 produced by aerobic glycolysis and glutaminolysis, may negatively influence erythroblast growth and viability.  
277 Extracellular lactate concentrations were typically <6 mM during culture in bioreactors or culture dishes (Supplementary  
278 Figure S2E). Nevertheless, a consistently lower cell-specific lactate production rate ( $q_{Lac,vol}$ ) was observed in bioreactor  
279 conditions both at 10 and 40% dO<sub>2</sub>, compared to culture dishes (>20% reduction; Figure 3F;  $q_{Lac,counts}$  available in  
280 Supplemental Figure S4D), suggesting a higher rate of aerobic glycolysis in static cultures. The  $q_{Lac}$  values decreased  
281 after 4 days of culture in both bioreactors and dish cultures to the same extent, which may be due to the concurrent  
282 reduction in growth rate. In addition to lactate, ammonia is a common inhibitor of cell proliferation. The ammonia  
283 production, however, was similar in bioreactor runs at 10% or 40% dO<sub>2</sub> and in standard dish cultures (Supplemental  
284 Figure S4B,E).

285 Although a 10% dO<sub>2</sub> setpoint is closer to the physiological oxygen concentrations in which erythroblasts proliferate *in*  
286 *vivo*, we conclude that the lower dO<sub>2</sub> does not alter growth or spontaneous differentiation compared to a 40% dO<sub>2</sub> setpoint.

## 287 **Shear stress affects erythroblast proliferation during expansion cultures**

288 Shear stress is another critical parameter in mammalian cell cultures. It can have a negative effect on growth and viability  
289 (Neunstoecklin et al., 2015), whereas insufficient stirring speeds leads to inadequate mixing and aeration when scaling  
290 up (Xing et al., 2009). To evaluate the effect of stirring speed on erythroblast proliferation, erythroblasts were inoculated  
291 in 0.5 L bioreactors, and the impeller speed was increased from 200 rpm to 600 rpm (tip speed = 880 mm/s) and 1800  
292 rpm (tip speed = 2640 mm/s). After 6 days of culture, a  $87.2 \pm 2.7$ -fold change in cell number was observed in the 600 rpm  
293 cultivations (Figure 4A), similar to the growth levels previously observed at 200 rpm and in static cultures. By contrast,  
294 an agitation speed of 1800 rpm reduced proliferation during the first 4 days of culture, which, however, recovered to  
295 values comparable to those observed at 600 rpm after 6 days of culture (Figure 4B).

296 The increase in stirring speed to 600 rpm did not enhance spontaneous differentiation, with only  $12.1 \pm 2.8\%$  cells in the  
297 most differentiated CD235<sup>+</sup> CD49d<sup>-</sup> compartment at day 6. At 1800 rpm, however, CD49d expression decreased in the  
298 first 3 days of culture, stabilizing in the following days (Figure 4C). Cell cycle progression was not affected by the stirring  
299 speed (Supplemental Figure S5).

300

301

## 302 **Terminal differentiation of erythroblast cultures in bioreactors**

303 We validated that erythroblasts expanded in bioreactors could be differentiated as standard static cultures throughout all  
304 conditions (data not shown). To examine terminal differentiation in bioreactors, day 10 PBMC-derived erythroblast  
305 cultures were seeded in differentiation medium at a starting cell concentration of  $1.5 \times 10^6$  cells/mL, both in bioreactors  
306 and culture dishes (Figure 5A). Bioreactors were controlled with the same conditions as in the reference expansion phase  
307 (40% dO<sub>2</sub>, pH 7.5, 200 rpm, 37°C). During the first 3 days of differentiation, cell numbers increased in both systems.  
308 Simultaneously, sparging was required to maintain dO<sub>2</sub> at 40% (Supplemental Figure S6). This was followed by a cell  
309 cycle arrest in both static and bioreactor conditions. Bioreactor cultures showed a gradual decrease in cell numbers until  
310 the end of culture, while cell numbers in static conditions remained similar (Figure 5B). Concurrently, the dO<sub>2</sub>  
311 concentration increased in absence of sparging after 4 days of culture.

312 Differentiation was evident from a decrease in mean cell diameter in bioreactors and culture dishes (Figure 5C) with a  
313 concomitant loss of CD49d and CD71 expression (Figure 5D-E). Hemoglobin accumulation and enucleation efficiency  
314 was also similar in static and stirred bioreactors (Figure 5F-G). Presence of enucleated cells and egressed nuclei was  
315 confirmed by cytopins (Figure 5H). In conclusion, erythroblast differentiation could also be supported in our stirred  
316 bioreactor systems, reaching similar levels of enucleation to those of culture dishes, albeit with slightly lower cell yields.

## 317 **Expansion cultures can be scaled up to 3 L bioreactors**

318 Knowing the boundaries to cultured erythroblast in STRs enabled us to scale-up from 300 mL cultures in 500 mL STRs  
319 to larger volumes. Day 8 erythroblasts cultures from PBMCs were seeded at a density of  $0.7 \times 10^6$  cells/mL in a 500 mL  
320 STR (initial culture volume = 100-150 mL), and cell density was adjusted daily to  $0.7 \times 10^6$  cells/mL by adding more  
321 medium. When the volume surpassed 400 mL, cells were transferred to a 3 L STR (minimum working volume = 800  
322 mL), operated with a tip speed similar to that tested in 0.5 L bioreactors (300 mm/s; single down-pumping marine  
323 impeller; diameter = 5 cm; 115 rpm). Medium was added to maintain cell density until a total volume of 2.5 L was  
324 reached. Subsequently, the total volume was maintained at 2.5 L and excess cells were removed (Figure 6A-B). The cell  
325 cultures proliferated exponentially for 9 subsequent days achieving an average 196-fold increase in the 3L STR, and 234-  
326 fold under static conditions (Figure 6C). Interestingly, the variation between 3 cultures was smaller in the STR (range:  
327 112-280-fold) compared to the same cultures expanded in dishes (range: 51-462-fold). After 9 days of culture, there was

328 no difference in viability or differentiation stage of the cells (Figure 6D-E; Supplemental Figure S7A). Similar to the 300  
329 mL cultures, lactate production in 2.5 L STRs was lower compared to static conditions (Supplemental Figure S7B).

330

## 331 **Discussion**

332 Efficient cRBC production requires the transition from static culture systems to scalable cultivation platforms. We  
333 established the process conditions (oxygen and agitation) required for effective expansion and differentiation of  
334 erythroblast cultures in STRs. Oxygen availability was critical during expansion of erythroblast cultures, whereas the  
335 requirement for oxygen decreased during terminal differentiation. Stirring speeds required for a homogeneous distribution  
336 of cells in the bioreactor did not affect cell growth or differentiation. Only much elevated stirring speeds led to a temporary  
337 cell growth arrest and an acceleration in spontaneous erythroblast differentiation. Within the operating boundaries  
338 established in this study, the STR culture volume could be scaled up from 300 mL to 2500 mL.

## 339 **Oxygen requirements of erythroblast in culture**

340 Using a combination of headspace N<sub>2</sub> gas flow and intermittent air allowed us to tightly control dO<sub>2</sub> in our bioreactor  
341 cultures. While low dO<sub>2</sub> setpoints can reduce the overall sparging requirements of the culture and are closer to the *in vivo*  
342 hematopoietic niche, no significant improvement on growth, lactate accumulation or spontaneous differentiation was  
343 observed in our experiments when the dO<sub>2</sub> setpoint was decreased from 40% to 10%. Although oxygen concentration  
344 setpoints lower than 10% dO<sub>2</sub> may enhance proliferation, maintaining a constant dO<sub>2</sub> <10% in our set-up is technically  
345 challenging due to the noise in dO<sub>2</sub> readings and the oscillations caused by the discrete sparging events. This could be  
346 addressed by using oxygen probes with lower response times or with aeration strategies in which gas composition is  
347 adjusted based on the dO<sub>2</sub> measurements, avoiding large oxygen concentration peaks during sparging. Studying the effect  
348 of lower and fluctuating dO<sub>2</sub> concentrations can provide further information on the potential challenges that could be  
349 faced in the large bioreactors required for the production of the required number of cRBCs for a single transfusion unit,  
350 in which oxygen and nutrient gradients are difficult to avoid, and the risk of having oxygen-limited regions is higher  
351 (Anane et al., 2021; Serrato et al., 2004).

352 The oxygen requirements of erythroblasts decreased during culture, from 2.01 to 0.55 pg/cell/h, and increasingly less  
353 during terminal differentiation. These values explain the fast decrease in dO<sub>2</sub> concentration in the initial 2 L bioreactor  
354 experiments, in which the k<sub>L</sub>a (0.27 1/h; headspace aeration only) could only support theoretical early erythroblast

355 concentrations of  $<0.97 \times 10^6$  cells/mL. Seahorse assays, typically used to quantify the oxygen consumption rates of  
356 erythroblasts, are performed with low cell numbers and in an assay medium with a composition different to that used for  
357 culture, potentially resulting in  $q_{O_2}$  values not representative of the culture conditions (van der Windt et al., 2016). Bayle  
358 et al. reported much lower  $q_{O_2}$  values for their bioreactor cultures, decreasing from 0.063 pg/cell/h for early erythroblasts  
359 to 0.017 pg/cell/h in the later stages of differentiation (Bayley et al., 2017). A similar decrease in oxygen requirements  
360 during erythroid differentiation was described by Browne et al., from 2.84 to 0.13 pg/cell/h for proerythroblasts and  
361 reticulocytes, respectively (Browne et al., 2014). This decrease in oxygen requirement could be a result of mitophagy at  
362 terminal stages of erythroblast differentiation decreasing mitochondria numbers and marking the shift to anaerobic  
363 metabolism as occurring in RBCs (Barde et al., 2013; Chen et al., 2008; Sandoval et al., 2008). Differences between our  
364 measured  $q_{O_2}$  values and those previously reported could be explained by differences in the differentiation status of  
365 erythroid cells used at the start of the bioreactor cultures, culture medium composition or oxygen concentration (Moradi  
366 et al., 2021). Of note, our values are in agreement with measured oxygen uptake rates of other human cell lines (0.4-6.2  
367 pg  $O_2$ /cell/h; (Wagner et al., 2011)). We suggest using continuous  $dO_2$  measurements and the dynamic method to estimate  
368  $q_{O_2}$  in erythroid cultures, as other methods such as using offgas data are difficult to implement due to the low oxygen  
369 consumption rates of mammalian cell cultures (Singh, 1996).

## 370 **Erythroid expansion cultures are robust to high stirring speeds**

371 This study shows that erythroblast expansion cultures can withstand agitation speeds of up to 600 rpm (tip speed = 880  
372 mm/s), without negatively affecting growth, viability or the differentiation stage of the cells. Surprisingly, very high  
373 stirring speeds (1800 rpm) led to a temporary arrest in growth, followed by a recovery after 5-6 days, accompanied by an  
374 acceleration in erythroid differentiation as reported previously for erythroid cultures in flasks under orbital shaking  
375 (Aglialoro et al., 2021). This recovery in growth could be explained by an adaptation of culture cells to these turbulent  
376 conditions, or by the selection of erythroblast cells more tolerant to agitation during the first days of culture. A more  
377 thorough characterization of this adaptation on not only the erythroblast transcriptome but also at the lipidomic and  
378 metabolomic level will need to be performed to identify (signaling) pathways triggered by this mechanical stress, the  
379 nature of the adaptive response (e.g. membrane composition remodeling), and to determine the mechanism under which  
380 erythroid differentiation is promoted under these conditions.

381 Interestingly, other studies have reported less tolerance of erythroblast cultures to agitation. Increased apoptosis,  
382 acceleration of erythroid differentiation, and lower enucleation levels have been observed in a gyro-rocker bioreactor at

383 low orbital speeds (20 rpm) (Boehm et al., 2010). Bayley et al. also observed a decrease in proliferation in stirred  
384 bioreactors compared to static cultures, although no significance difference on growth was observed between stirring  
385 speeds of 300 and 450 rpm (tip speeds = 180 and 270 mm/s, respectively) (Bayley et al., 2017). Han et al. observed a  
386 dependence on the inoculum age to agitation tolerance, with proerythroblast and basophilic erythroblast cultures showing  
387 a quick decrease in growth and viability in microbioreactors agitated at 300 rpm (tip speed = 180 mm/s), while more  
388 mature cells (day 12 after CD34<sup>+</sup> isolation and start of culture), could tolerate the same conditions (Han et al., 2021).  
389 However, it is difficult to directly compare the hydrodynamic conditions between these reports, partly due to differences  
390 in the culture set-up but also due to a lack of consensus on which mixing parameter (rpm, tip speed, volumetric power  
391 input) is more appropriate to do this comparison, which together co-define the dynamic shear stress experienced by cells.  
392 Local turbulent energy dissipation rate (EDR) has been suggested as an alternative parameter to define optimal ranges of  
393 agitation for mammalian cell culture (Chalmers, 2015). Supporting the relevance of energy dissipation rate, it has been  
394 recently reported that turbulence and not shear stress is critical for large scale platelet production (Ito et al., 2018).  
395 Estimates of EDR in STRs could be useful to rationally drive the scale-up of the process, ensuring limited exposure of  
396 erythroblast to excessive hydrodynamic forces.

397 Although the effect of shear stress and EDR can be evaluated in STRs by varying the agitation rate, changes in stirring  
398 speed also affect the mass transfer rate between the gas and liquid phases, impacting the aeration requirements to control  
399 dO<sub>2</sub> and pH at the defined setpoints. This, in turn, can influence the exposure of cells to high local O<sub>2</sub> (and CO<sub>2</sub>, if pH is  
400 controlled with this gas) concentrations and to high EDR regions due to bubble bursting phenomena (Walls et al., 2017).  
401 A full uncoupling of agitation and aeration is challenging, as other aeration strategies such as using submerged oxygen-  
402 permeable membranes, can also lead to undesired effect such as very high local O<sub>2</sub> concentrations (Aunins & Henzler,  
403 2001; Côté et al., 1989).

## 404 **Quantification of metabolite consumption/production rates in erythroid cultures**

405 We observed a decrease in erythroblast proliferation during expansion cultures, with growth rates as low as ~0.3 1/day at  
406 the end of the cultures. Growth limitations in erythroblast batch and fed-batch cultures has been previously reported, but  
407 the origin of this limitation has not been identified yet (Bayley et al., 2017; Glen et al., 2018). Here we report lactate and  
408 ammonium concentrations below 6 and 0.6 mM respectively, which are lower than typical growth-inhibiting  
409 concentrations for other animal cell lines (Cruz et al., 2000; Hassell et al., 1991; Ozturk et al., 1992). Interestingly, we  
410 measured lactate production rates ( $q_{Lac}$ ) of 0.5-2.5 pmol/cell/day, significantly lower than those reported for other



411 erythroid cultures (3-12 pmol/cell/day; (Bayley et al., 2017; Lee et al., 2018; Patel et al., 2000; Sivalingam et al., 2020)).  
412 Dissolved oxygen concentration in the bioreactor did not have a significant effect on  $q_{Lac}$ , but static cultures consistently  
413 showed higher rates in later days of culture. Oxygen limitations caused by low oxygen concentrations (<10% dO<sub>2</sub>) in the  
414 bottom of culture dishes could lead to an increase in anaerobic glycolysis rates in erythroblasts cultured under static  
415 conditions, leading to the observed lactate production (Al-Ani et al., 2018). Even at the measured low concentrations,  
416 lactate can potentially induce activation of erythroid-related genes such as STAT5, affecting erythroid differentiation  
417 dynamics (Luo et al., 2017). Strategies to limit lactate production in culture could be implemented, such as feeding profiles  
418 that limit glucose concentrations during culture.

## 419 **Outlook**

420 A 200-fold expansion per PBMC already takes place in the first 8 days of culture (before reactor inoculation), still  
421 performed under static conditions in culture dishes (Heshusius et al., 2019), resulting in an overall  $200 \times 750 = 150.000$ -  
422 fold expansion after 10 days of culture in the bioreactor. The high cell yields in this first culture stage are partly due to  
423 the positive contribution of CD14<sup>+</sup> monocytes/macrophages present in the PBMC pool by the production of soluble  
424 factors that support erythroblast expansion (Heideveld et al., 2015; van den Akker et al., 2010). Full translation of our  
425 protocol to STRs would require defining operating conditions that would support HSC proliferation and macrophages in  
426 the first days of culture.

427 While we could scale-up erythroblast expansion cultures from dishes to 0.5 L and 3.0 L bioreactors, the large number of  
428 cells required for a single cRBC transfusion unit would still require prohibitively large STRs. Perfusion approaches could  
429 be used to increase cell concentrations, while continuously removing lactate and other produced inhibitory metabolic  
430 byproducts. The cell-retention strategies required for perfusion could also be of value to perform the required medium  
431 changes when transitioning from proliferation to differentiation in culture, where removal of hSCF is needed for efficient  
432 maturation and enucleation. This, combined with the development of low cost media formulations, would allow for a  
433 large scale cost-effective production of cRBCs.

## 434 Abbreviations

|               |                                                     |
|---------------|-----------------------------------------------------|
| BM            | Bone marrow                                         |
| BSA           | Bovine serum albumin                                |
| CD235a        | Glycophorin A                                       |
| CD49d         | Integrin alpha 4                                    |
| CD71          | Transferrin receptor 1                              |
| cRBC          | Cultured red blood cell                             |
| Dex           | Dexamethasone                                       |
| EDR           | Energy dissipation rate                             |
| Epo           | Erythropoietin                                      |
| EpoR          | Erythropoietin receptor                             |
| FC            | Fold change                                         |
| HEPES         | 4-(2-hydroxyethyl)-1-piperazineethanesulfonic acid  |
| HIF1 $\alpha$ | Hypoxia-inducible factor 1, alpha subunit           |
| HSA           | Human serum albumin                                 |
| HSC           | Hematopoietic stem cell                             |
| hSCF          | Human stem cell factor                              |
| NFATC2        | Nuclear factor of activated T-cells 2               |
| OXPPOS        | Oxidative phosphorylation                           |
| PBMC          | Peripheral blood mononuclear cell                   |
| PBS           | Phosphate-buffered saline                           |
| PI            | Propidium iodide                                    |
| RBC           | Red blood cell                                      |
| rpm           | Revolutions per minute                              |
| SCF           | Stem cell factor                                    |
| STAT5         | Signal transducer and activator of transcription 5A |
| STR           | Stirred tank reactor                                |
| TCA           | Tricarboxylic acid                                  |

435

## 436 List of symbols

|                 |                                                                                                                                                                                                                                      |
|-----------------|--------------------------------------------------------------------------------------------------------------------------------------------------------------------------------------------------------------------------------------|
| $V_L$           | Volume of culture (units: L)                                                                                                                                                                                                         |
| $C_N$           | Cell concentration (units: cells/mL of culture)                                                                                                                                                                                      |
| $C_V$           | Biomass concentration (units: $\mu\text{m}^3$ of cells/mL of culture)                                                                                                                                                                |
| $N$             | Total number of cells (units: cells)                                                                                                                                                                                                 |
| $\mu_{max}$     | Maximal growth rate (units = 1/day). Can be calculated using cell counts ( $\mu_{max,counts}$ ) or biomass concentration ( $\mu_{max,vol}$ )                                                                                         |
| $\tau$          | Doubling time (units = day).                                                                                                                                                                                                         |
| $k_L a$         | Overall volumetric mass transfer coefficient of the system for oxygen, recalculated to a liquid-side mass transfer oxygen composition gradient (units = 1/h)                                                                         |
| $c_{O_2}$       | Concentration of dissolved oxygen in the liquid (units: mg $O_2$ /L)                                                                                                                                                                 |
| $c_{O_2}^{sat}$ | Concentration of saturation for oxygen in the liquid (units: mg $O_2$ /L)                                                                                                                                                            |
| $dO_2$          | Dissolved oxygen concentration as percentage of the saturation concentration at the defined conditions (37°C, 1 atm, air; units = %)                                                                                                 |
| $q_{O_2}$       | Cell-specific consumption rate of oxygen (units = pg $O_2$ /cell/day)                                                                                                                                                                |
| $q_{lac}$       | Cell-specific production rate of lactate. Can be calculated using cell counts ( $q_{lac,counts}$ ; units = mol lactate/cell/day) or biomass concentration ( $q_{lac,volume}$ ; units = mol lactate/ $\mu\text{m}^3$ cell/day)        |
| $q_{NH_4}$      | Cell-specific production rate of ammonium. Can be calculated using cell counts ( $q_{NH_4,counts}$ ; units = mol $NH_4^+$ /cell/day) or biomass concentration ( $q_{NH_4,volume}$ ; units = mol $NH_4^+$ / $\mu\text{m}^3$ cell/day) |
| $C_{lac}$       | Extracellular lactate concentration (units: mol lactate/L)                                                                                                                                                                           |
| $C_{NH_4}$      | Extracellular ammonium concentration (units: mol $NH_4^+$ /L)                                                                                                                                                                        |

437

## 438 **Acknowledgements**

439 We thank Tom van Arragon and Cristina Bernal Martínez (Applikon Biotechnology; Delft; The Netherlands) for technical  
440 help and advice on bioreactor cultures. This work was supported by the ZonMW TAS program (project 116003004), by  
441 the Landsteiner Foundation for Bloodtransfusion Research (LSBR project 1239), and by Sanquin Blood Supply grants  
442 PPOC17-28 and PPOC119-14.

443

## 444 **Authorship**

445 Contribution: J.S.G.M. performed the experiments; J.S.G.M., E.v.d.A., A.W., and M.v.L. designed the experiments,  
446 analyzed the data, and wrote the manuscript; G.I. and L.v.d.W contributed to data analysis and writing of the manuscript.  
447 All authors critically revised the manuscript.

448 **Conflict-of-interest disclosure:** The authors declare no competing financial interests.

449 **Correspondence:** Marieke von Lindern, Department of Hematopoiesis, Sanquin Research and Landsteiner Laboratory,  
450 Amsterdam UMC, Plesmanlaan 125, 1066CX Amsterdam, The Netherlands; e-mail: [m.vonlindern@sanquin.nl](mailto:m.vonlindern@sanquin.nl); and Joan  
451 Sebastián Gallego-Murillo, Department of Hematopoiesis, Sanquin Research and Landsteiner Laboratory, Amsterdam  
452 UMC, Plesmanlaan 125, 1066CX Amsterdam, The Netherlands; e-mail: [j.gallegomurillo@sanquin.nl](mailto:j.gallegomurillo@sanquin.nl).

## 453 **References**

- 454 Aglialoro, F., Abay, A., Yagci, N., Rab, M. A. E., Kaestner, L., van Wijk, R., von Lindern, M., & van den Akker, E.  
455 (2021). Mechanical Stress Induces Ca<sup>2+</sup>-Dependent Signal Transduction in Erythroblasts and Modulates  
456 Erythropoiesis. *International Journal of Molecular Sciences*, *22*(2). <https://doi.org/10.3390/ijms22020955>
- 457 Aglialoro, F., Hofsink, N., Hofman, M., Brandhorst, N., & van den Akker, E. (2020). Inside Out Integrin Activation  
458 Mediated by PIEZO1 Signaling in Erythroblasts. *Frontiers in Physiology*, *11*, 958.  
459 <https://doi.org/10.3389/fphys.2020.00958>
- 460 Al-Ani, A., Toms, D., Kondro, D., Thundathil, J., Yu, Y., & Ungrin, M. (2018). Oxygenation in cell culture: Critical  
461 parameters for reproducibility are routinely not reported. *PLoS ONE*, *13*(10), e0204269.  
462 <https://doi.org/10.1371/journal.pone.0204269>
- 463 Allenby, M. C., Panoskaltsis, N., Tahlawi, A., Dos Santos, S. B., & Mantalaris, A. (2019). Dynamic human erythropoiesis  
464 in a three-dimensional perfusion bone marrow biomimicry. *Biomaterials*, *188*, 24–37.  
465 <https://doi.org/10.1016/j.biomaterials.2018.08.020>
- 466 Anane, E., Knudsen, I. M., & Wilson, G. C. (2021). Scale-down cultivation in mammalian cell bioreactors—The effect  
467 of bioreactor mixing time on the response of CHO cells to dissolved oxygen gradients. *Biochemical Engineering*  
468 *Journal*, *166*, 107870. <https://doi.org/10.1016/j.bej.2020.107870>
- 469 Aunins, J. G., & Henzler, H.-J. (2001). Aeration in Cell Culture Bioreactors. In *Biotechnology Set* (pp. 219–281). John  
470 Wiley & Sons, Ltd. <https://doi.org/10.1002/9783527620999.ch11b>
- 471 Avgerinos, G. C., Drapeau, D., Socolow, J. S., Mao, J., Hsiao, K., & Broeze, R. J. (1990). Spin Filter Perfusion System  
472 for High Density Cell Culture: Production of Recombinant Urinary Type Plasminogen Activator in CHO Cells.  
473 *Bio/Technology*, *8*(1), 54–58. <https://doi.org/10.1038/nbt0190-54>
- 474 Bakker, W. J., Blázquez-Domingo, M., Kolbus, A., Besooyen, J., Steinlein, P., Beug, H., Coffèr, P. J., Löwenberg, B.,  
475 von Lindern, M., & van Dijk, T. B. (2004). FoxO3a regulates erythroid differentiation and induces BTG1, an  
476 activator of protein arginine methyl transferase 1. *Journal of Cell Biology*, *164*(2), 175–184.  
477 <https://doi.org/10.1083/jcb.200307056>
- 478 Bandyopadhyay, B., Humphrey, A. E., & Taguchi, H. (1967). Dynamic measurement of the volumetric oxygen transfer  
479 coefficient in fermentation systems. *Biotechnology and Bioengineering*, *9*(4), 533–544.  
480 <https://doi.org/10.1002/bit.260090408>

- 481 Bapat, A., Schippel, N., Shi, X., Jasbi, P., Gu, H., Kala, M., Sertil, A., & Sharma, S. (2021). Hypoxia promotes erythroid  
482 differentiation through the development of progenitors and proerythroblasts. *Experimental Hematology*, *97*, 32-  
483 46.e35. <https://doi.org/10.1016/j.exphem.2021.02.012>
- 484 Barde, I., Rauwel, B., Marin-Florez, R. M., Corsinotti, A., Laurenti, E., Verp, S., Offner, S., Marquis, J., Kapopoulou,  
485 A., Vanicek, J., & Trono, D. (2013). A KRAB/KAP1-miRNA cascade regulates erythropoiesis through stage-  
486 specific control of mitophagy. *Science (New York, N.Y.)*, *340*(6130), 350–353.  
487 <https://doi.org/10.1126/science.1232398>
- 488 Bayley, R., Ahmed, F., Glen, K., McCall, M., Stacey, A., & Thomas, R. (2017). The productivity limit of manufacturing  
489 blood cell therapy in scalable stirred bioreactors. *Journal of Tissue Engineering and Regenerative Medicine*, n/a-  
490 n/a. <https://doi.org/10.1002/term.2337>
- 491 Bixel, M. G., Kusumbe, A. P., Ramasamy, S. K., Sivaraj, K. K., Butz, S., Vestweber, D., & Adams, Ralf. H. (2017). Flow  
492 Dynamics and HSPC Homing in Bone Marrow Microvessels. *Cell Reports*, *18*(7), 1804–1816.  
493 <https://doi.org/10.1016/j.celrep.2017.01.042>
- 494 Boehm, D., Murphy, W. G., & Al-Rubeai, M. (2010). The effect of mild agitation on in vitro erythroid development.  
495 *Journal of Immunological Methods*, *360*(1–2), 20–29. <https://doi.org/10.1016/j.jim.2010.05.007>
- 496 Browne, S. M., Daud, H., Murphy, W. G., & Al-Rubeai, M. (2014). Measuring dissolved oxygen to track erythroid  
497 differentiation of hematopoietic progenitor cells in culture. *Journal of Biotechnology*, *187*, 135–138.  
498 <https://doi.org/10.1016/j.jbiotec.2014.07.433>
- 499 Brugarolas, J., Lei, K., Hurley, R. L., Manning, B. D., Reiling, J. H., Hafen, E., Witters, L. A., Ellisen, L. W., & Kaelin,  
500 W. G. (2004). Regulation of mTOR function in response to hypoxia by REDD1 and the TSC1/TSC2 tumor  
501 suppressor complex. *Genes & Development*, *18*(23), 2893–2904. <https://doi.org/10.1101/gad.1256804>
- 502 Caielli, S., Cardenas, J., de Jesus, A. A., Baisch, J., Walters, L., Blanck, J. P., Balasubramanian, P., Stagnar, C., Ohouo,  
503 M., Hong, S., Nassi, L., Stewart, K., Fuller, J., Gu, J., Banchereau, J. F., Wright, T., Goldbach-Mansky, R., &  
504 Pascual, V. (2021). Erythroid mitochondrial retention triggers myeloid-dependent type I interferon in human  
505 SLE. *Cell*, *184*(17), 4464-4479.e19. <https://doi.org/10.1016/j.cell.2021.07.021>
- 506 Caulier, A., Jankovsky, N., Demont, Y., Ouled-Haddou, H., Demagny, J., Guitton, C., Merlusca, L., Lebon, D., Vong, P.,  
507 Aubry, A., Lahary, A., Rose, C., Gréaume, S., Cardon, E., Platon, J., Ouadid-Ahidouch, H., Rochette, J.,  
508 Marolleau, J.-P., Picard, V., & Garçon, L. (2020). PIEZO1 activation delays erythroid differentiation of normal

- 509 and hereditary xerocytosis-derived human progenitor cells. *Haematologica*, 105(3), 610–622.  
510 <https://doi.org/10.3324/haematol.2019.218503>
- 511 Chalmers, J. J. (2015). Mixing, aeration and cell damage, 30+ years later: What we learned, how it affected the cell culture  
512 industry and what we would like to know more about. *Current Opinion in Chemical Engineering*, 10, 94–102.  
513 <https://doi.org/10.1016/j.coche.2015.09.005>
- 514 Chen, M., Sandoval, H., & Wang, J. (2008). Selective mitochondrial autophagy during erythroid maturation. *Autophagy*,  
515 4(7), 926–928. <https://doi.org/10.4161/auto.6716>
- 516 Chu, L., & Robinson, D. K. (2001). Industrial choices for protein production by large-scale cell culture. *Current Opinion*  
517 *in Biotechnology*, 12(2), 180–187. [https://doi.org/10.1016/S0958-1669\(00\)00197-X](https://doi.org/10.1016/S0958-1669(00)00197-X)
- 518 Côté, P., Bersillon, J.-L., & Huyard, A. (1989). Bubble-free aeration using membranes: Mass transfer analysis. *Journal*  
519 *of Membrane Science*, 47(1), 91–106. [https://doi.org/10.1016/S0376-7388\(00\)80862-5](https://doi.org/10.1016/S0376-7388(00)80862-5)
- 520 Cruz, H. J., Freitas, C. M., Alves, P. M., Moreira, J. L., & Carrondo, M. J. T. (2000). Effects of ammonia and lactate on  
521 growth, metabolism, and productivity of BHK cells. *Enzyme and Microbial Technology*, 27(1), 43–52.  
522 [https://doi.org/10.1016/S0141-0229\(00\)00151-4](https://doi.org/10.1016/S0141-0229(00)00151-4)
- 523 Daniels, G. (2013). *Human Blood Groups* (3rd ed.). Wiley-Blackwell.
- 524 Farid, S. S. (2007). Process economics of industrial monoclonal antibody manufacture. *Journal of Chromatography B*,  
525 848(1), 8–18. <https://doi.org/10.1016/j.jchromb.2006.07.037>
- 526 Glen, K. E., Cheeseman, E. A., Stacey, A. J., & Thomas, R. J. (2018). A mechanistic model of erythroblast growth  
527 inhibition providing a framework for optimisation of cell therapy manufacturing. *Biochemical Engineering*  
528 *Journal*, 133, 28–38. <https://doi.org/10.1016/j.bej.2018.01.033>
- 529 Godoy-Silva, R., Chalmers, J. J., Casnocha, S. A., Bass, L. A., & Ma, N. (2009). Physiological responses of CHO cells  
530 to repetitive hydrodynamic stress. *Biotechnology and Bioengineering*, 103(6), 1103–1117.  
531 <https://doi.org/10.1002/bit.22339>
- 532 Gonzalez-Menendez, P., Romano, M., Yan, H., Deshmukh, R., Papoin, J., Oburoglu, L., Daumur, M., Dumé, A.-S.,  
533 Phadke, I., Mongellaz, C., Qu, X., Bories, P.-N., Fontenay, M., An, X., Dardalhon, V., Sitbon, M., Zimmermann,  
534 V. S., Gallagher, P. G., Tardito, S., ... Kinet, S. (2021). An IDH1-vitamin C crosstalk drives human erythroid  
535 development by inhibiting pro-oxidant mitochondrial metabolism. *Cell Reports*, 34(5), 108723.  
536 <https://doi.org/10.1016/j.celrep.2021.108723>

- 537 Goto, T., Ubukawa, K., Kobayashi, I., Sugawara, K., Asanuma, K., Sasaki, Y., Guo, Y.-M., Takahashi, N., Sawada, K.,  
538 Wakui, H., & Nunomura, W. (2019). ATP produced by anaerobic glycolysis is essential for enucleation of human  
539 erythroblasts. *Experimental Hematology*, *72*, 14–26.e1. <https://doi.org/10.1016/j.exphem.2019.02.004>
- 540 Griffiths, R. E., Kupzig, S., Cogan, N., Mankelow, T. J., Betin, V. M. S., Trakarnsanga, K., Massey, E. J., Lane, J. D.,  
541 Parsons, S. F., & Anstee, D. J. (2012). Maturing reticulocytes internalize plasma membrane in glycophorin A–  
542 containing vesicles that fuse with autophagosomes before exocytosis. *Blood*, *119*(26), 6296–6306.  
543 <https://doi.org/10.1182/blood-2011-09-376475>
- 544 Han, S. Y., Lee, E. M., Lee, J., Lee, H., Kwon, A. M., Ryu, K. Y., Choi, W.-S., & Baek, E. J. (2021). Red cell  
545 manufacturing using parallel stirred-tank bioreactors at the final stages of differentiation enhances reticulocyte  
546 maturation. *Biotechnology and Bioengineering*, *118*(5). <https://doi.org/10.1002/bit.27691>
- 547 Hassell, T., Gleave, S., & Butler, M. (1991). Growth inhibition in animal cell culture. The effect of lactate and ammonia.  
548 *Applied Biochemistry and Biotechnology*, *30*(1), 29–41. <https://doi.org/10.1007/BF02922022>
- 549 Heideveld, E., Masiello, F., Marra, M., Esteghamat, F., Yağcı, N., von Lindern, M., Migliaccio, A. R. F., & van den  
550 Akker, E. (2015). CD14+ cells from peripheral blood positively regulate hematopoietic stem and progenitor cell  
551 survival resulting in increased erythroid yield. *Haematologica*, *100*(11), 1396–1406.  
552 <https://doi.org/10.3324/haematol.2015.125492>
- 553 Heshusius, S., Heideveld, E., Burger, P., Thiel-Valkhof, M., Sellink, E., Varga, E., Ovchinnikova, E., Visser, A., Martens,  
554 J. H. A., von Lindern, M., & van den Akker, E. (2019). Large-scale in vitro production of red blood cells from  
555 human peripheral blood mononuclear cells. *Blood Advances*, *3*(21), 3337–3350.  
556 <https://doi.org/10.1182/bloodadvances.2019000689>
- 557 Housler, G. J., Miki, T., Schmelzer, E., Pekor, C., Zhang, X., Kang, L., Voskianian-Berse, V., Abbot, S., Zeilinger, K.,  
558 & Gerlach, J. C. (2012). Compartmental hollow fiber capillary membrane-based bioreactor technology for in  
559 vitro studies on red blood cell lineage direction of hematopoietic stem cells. *Tissue Engineering. Part C*,  
560 *Methods*, *18*(2), 133–142. <https://doi.org/10.1089/ten.TEC.2011.0305>
- 561 Ito, Y., Nakamura, S., Sugimoto, N., Shigemori, T., Kato, Y., Ohno, M., Sakuma, S., Ito, K., Kumon, H., Hirose, H.,  
562 Okamoto, H., Nogawa, M., Iwasaki, M., Kihara, S., Fujio, K., Matsumoto, T., Higashi, N., Hashimoto, K.,  
563 Sawaguchi, A., ... Eto, K. (2018). Turbulence Activates Platelet Biogenesis to Enable Clinical Scale Ex Vivo  
564 Production. *Cell*, *174*(3), 636–648.e18. <https://doi.org/10.1016/j.cell.2018.06.011>



- 565 Jan, D. C. H., Petch, D. A., Huzel, N., & Butler, M. (1997). The effect of dissolved oxygen on the metabolic profile of a  
566 murine hybridoma grown in serum-free medium in continuous culture. *Biotechnology and Bioengineering*,  
567 *54*(2), 153–164. [https://doi.org/10.1002/\(SICI\)1097-0290\(19970420\)54:2<153::AID-BIT7>3.0.CO;2-K](https://doi.org/10.1002/(SICI)1097-0290(19970420)54:2<153::AID-BIT7>3.0.CO;2-K)
- 568 Jensen, E. L., Gonzalez-Ibanez, A. M., Mendoza, P., Ruiz, L. M., Riedel, C. A., Simon, F., Schuringa, J. J., & Elorza, A.  
569 A. (2019). Copper deficiency-induced anemia is caused by a mitochondrial metabolic reprogramming in  
570 erythropoietic cells. *Metallomics*, *11*(2), 282–290. <https://doi.org/10.1039/c8mt00224j>
- 571 Karst, D. J., Serra, E., Villiger, T. K., Soos, M., & Morbidelli, M. (2016). Characterization and comparison of ATF and  
572 TFF in stirred bioreactors for continuous mammalian cell culture processes. *Biochemical Engineering Journal*,  
573 *110*, 17–26. <https://doi.org/10.1016/j.bej.2016.02.003>
- 574 Klinkenberg, E. F., Huis In't Veld, E. M. J., de Wit, P. D., van Dongen, A., Daams, J. G., de Kort, W. L. A. M., & Fransen,  
575 M. P. (2019). Blood donation barriers and facilitators of Sub-Saharan African migrants and minorities in Western  
576 high-income countries: A systematic review of the literature. *Transfusion Medicine (Oxford, England)*, *29*(Suppl  
577 1), 28–41. <https://doi.org/10.1111/tme.12517>
- 578 Koleva, L., Bovt, E., Ataulakhanov, F., & Sinauridze, E. (2020). Erythrocytes as Carriers: From Drug Delivery to  
579 Biosensors. *Pharmaceutics*, *12*(3), E276. <https://doi.org/10.3390/pharmaceutics12030276>
- 580 Kretzmer, G., & Schügerl, K. (1991). Response of mammalian cells to shear stress. *Applied Microbiology and*  
581 *Biotechnology*, *34*(5), 613–616. <https://doi.org/10.1007/BF00167909>
- 582 Kupzig, S., Parsons, S. F., Curnow, E., Anstee, D. J., & Blair, A. (2017). Superior survival of ex vivo cultured human  
583 reticulocytes following transfusion into mice. *Haematologica*, *102*(3), 476–483.  
584 <https://doi.org/10.3324/haematol.2016.154443>
- 585 Law, B., & Gilbert, A. B. (2021). *Methods of generating enucleated erythroid cells using myo-inositol* (United States  
586 Patent No. US20210130780A1).
- 587 Leberbauer, C., Boulmé, F., Unfried, G., Huber, J., Beug, H., & Müllner, E. W. (2005). Different steroids co-regulate  
588 long-term expansion versus terminal differentiation in primary human erythroid progenitors. *Blood*, *105*(1), 85–  
589 94. <https://doi.org/10.1182/blood-2004-03-1002>
- 590 Lee, E., Han, S. Y., Choi, H. S., Chun, B., Hwang, B., & Baek, E. J. (2015). Red Blood Cell Generation by Three-  
591 Dimensional Aggregate Cultivation of Late Erythroblasts. *Tissue Engineering. Part A*, *21*(3–4), 817–828.  
592 <https://doi.org/10.1089/ten.tea.2014.0325>

- 593 Lee, E., Lim, Z. R., Chen, H.-Y., Yang, B. X., Lam, A. T.-L., Chen, A. K.-L., Sivalingam, J., Reuveny, S., Loh, Y.-H.,  
594 & Oh, S. K.-W. (2018). Defined Serum-Free Medium for Bioreactor Culture of an Immortalized Human  
595 Erythroblast Cell Line. *Biotechnology Journal*, 13(4), e1700567. <https://doi.org/10.1002/biot.201700567>
- 596 Luo, S.-T., Zhang, D.-M., Qin, Q., Lu, L., Luo, M., Guo, F.-C., Shi, H.-S., Jiang, L., Shao, B., Li, M., Yang, H.-S., &  
597 Wei, Y.-Q. (2017). The Promotion of Erythropoiesis via the Regulation of Reactive Oxygen Species by Lactic  
598 Acid. *Scientific Reports*, 7, 38105. <https://doi.org/10.1038/srep38105>
- 599 Mas-Bargues, C., Sanz-Ros, J., Román-Domínguez, A., Inglés, M., Gimeno-Mallench, L., El Alami, M., Viña-Almunia,  
600 J., Gambini, J., Viña, J., & Borrás, C. (2019). Relevance of Oxygen Concentration in Stem Cell Culture for  
601 Regenerative Medicine. *International Journal of Molecular Sciences*, 20(5), 1195.  
602 <https://doi.org/10.3390/ijms20051195>
- 603 Mazo, I. B., Gutierrez-Ramos, J.-C., Frenette, P. S., Hynes, R. O., Wagner, D. D., & von Andrian, U. H. (1998).  
604 Hematopoietic Progenitor Cell Rolling in Bone Marrow Microvessels: Parallel Contributions by Endothelial  
605 Selectins and Vascular Cell Adhesion Molecule 1. *Journal of Experimental Medicine*, 188(3), 465–474.  
606 <https://doi.org/10.1084/jem.188.3.465>
- 607 Migliaccio, G., Di Pietro, R., di Giacomo, V., Di Baldassarre, A., Migliaccio, A. R., Maccioni, L., Galanello, R., &  
608 Papayannopoulou, T. (2002). In Vitro Mass Production of Human Erythroid Cells from the Blood of Normal  
609 Donors and of Thalassemic Patients. *Blood Cells, Molecules, and Diseases*, 28(2), 169–180.  
610 <https://doi.org/10.1006/bcmd.2002.0502>
- 611 Mohebbi-Kalhari, D., Behzadmehr, A., Doillon, C. J., & Hadjizadeh, A. (2012). Computational modeling of adherent  
612 cell growth in a hollow-fiber membrane bioreactor for large-scale 3-D bone tissue engineering. *Journal of*  
613 *Artificial Organs*, 15(3), 250–265. <https://doi.org/10.1007/s10047-012-0649-1>
- 614 Moradi, F., Moffatt, C., & Stuart, J. A. (2021). The Effect of Oxygen and Micronutrient Composition of Cell Growth  
615 Media on Cancer Cell Bioenergetics and Mitochondrial Networks. *Biomolecules*, 11(8), 1177.  
616 <https://doi.org/10.3390/biom11081177>
- 617 Neunstoecklin, B., Stettler, M., Solacroup, T., Broly, H., Morbidelli, M., & Soos, M. (2015). Determination of the  
618 maximum operating range of hydrodynamic stress in mammalian cell culture. *Journal of Biotechnology*, 194,  
619 100–109. <https://doi.org/10.1016/j.jbiotec.2014.12.003>
- 620 Ozturk, S. S., & Palsson, B. O. (1991). Effect of medium osmolarity on hybridoma growth, metabolism, and antibody  
621 production. *Biotechnology and Bioengineering*, 37(10), 989–993. <https://doi.org/10.1002/bit.260371015>

- 622 Ozturk, S. S., Riley, M. R., & Palsson, B. O. (1992). Effects of ammonia and lactate on hybridoma growth, metabolism,  
623 and antibody production. *Biotechnology and Bioengineering*, 39(4), 418–431.  
624 <https://doi.org/10.1002/bit.260390408>
- 625 Patel, S. D., Papoutsakis, E. T., Winter, J. N., & Miller, W. M. (2000). The Lactate Issue Revisited: Novel Feeding  
626 Protocols To Examine Inhibition of Cell Proliferation and Glucose Metabolism in Hematopoietic Cell Cultures.  
627 *Biotechnology Progress*, 16(5), 885–892. <https://doi.org/10.1021/bp000080a>
- 628 Pellegrin, S., Severn, C. E., & Toye, A. M. (2021). Towards manufactured red blood cells for the treatment of inherited  
629 anemia. *Haematologica*. <https://doi.org/10.3324/haematol.2020.268847>
- 630 Peniche Silva, C. J., Liebsch, G., Meier, R. J., Gutbrod, M. S., Balmayor, E. R., & van Griensven, M. (2020). A New  
631 Non-invasive Technique for Measuring 3D-Oxygen Gradients in Wells During Mammalian Cell Culture.  
632 *Frontiers in Bioengineering and Biotechnology*. <https://doi.org/10.3389/fbioe.2020.00595>
- 633 Peyrard, T., Bardiaux, L., Krause, C., Kobari, L., Lapillonne, H., Andreu, G., & Douay, L. (2011). Banking of Pluripotent  
634 Adult Stem Cells as an Unlimited Source for Red Blood Cell Production: Potential Applications for  
635 Alloimmunized Patients and Rare Blood Challenges. *Transfusion Medicine Reviews*, 25(3), 206–216.  
636 <https://doi.org/10.1016/j.tmr.2011.01.002>
- 637 Piret, J. M., Devens, D. A., & Cooney, C. L. (1991). Nutrient and metabolite gradients in mammalian cell hollow fiber  
638 bioreactors. *The Canadian Journal of Chemical Engineering*, 69(2), 421–428.  
639 <https://doi.org/10.1002/cjce.5450690204>
- 640 Place, T. L., Domann, F. E., & Case, A. J. (2017). Limitations of oxygen delivery to cells in culture: An underappreciated  
641 problem in basic and translational research. *Free Radical Biology and Medicine*, 113, 311–322.  
642 <https://doi.org/10.1016/j.freeradbiomed.2017.10.003>
- 643 Preissmann, A., Wiesmann, R., Buchholz, R., Werner, R. G., & Noé, W. (1997). Investigations on oxygen limitations of  
644 adherent cells growing on macroporous microcarriers. *Cytotechnology*, 24(2), 121–134.  
645 <https://doi.org/10.1023/A:1007973924865>
- 646 Ratcliffe, E., Glen, K. E., Workman, V. L., Stacey, A. J., & Thomas, R. J. (2012). A novel automated bioreactor for  
647 scalable process optimisation of haematopoietic stem cell culture. *Journal of Biotechnology*, 161(3), 387–390.  
648 <https://doi.org/10.1016/j.jbiotec.2012.06.025>

- 649 Restelli, V., Wang, M.-D., Huzel, N., Ethier, M., Perreault, H., & Butler, M. (2006). The effect of dissolved oxygen on  
650 the production and the glycosylation profile of recombinant human erythropoietin produced from CHO cells.  
651 *Biotechnology and Bioengineering*, 94(3), 481–494. <https://doi.org/10.1002/bit.20875>
- 652 Richard, A., Vallin, E., Romestaing, C., Roussel, D., Gandrillon, O., & Gonin-Giraud, S. (2019). Erythroid differentiation  
653 displays a peak of energy consumption concomitant with glycolytic metabolism rearrangements. *PLOS ONE*,  
654 14(9), e0221472. <https://doi.org/10.1371/journal.pone.0221472>
- 655 Rodrigues, M. E., Costa, A. R., Henriques, M., Azeredo, J., & Oliveira, R. (2010). Technological progresses in  
656 monoclonal antibody production systems. *Biotechnology Progress*, 26(2), 332–351.  
657 <https://doi.org/10.1002/btpr.348>
- 658 Sandoval, H., Thiagarajan, P., Dasgupta, S. K., Schumacher, A., Prchal, J. T., Chen, M., & Wang, J. (2008). Essential  
659 role for Nix in autophagic maturation of erythroid cells. *Nature*, 454(7201), 232–235.  
660 <https://doi.org/10.1038/nature07006>
- 661 Serrato, J. A., Palomares, L. A., Meneses-Acosta, A., & Ramírez, O. T. (2004). Heterogeneous conditions in dissolved  
662 oxygen affect N-glycosylation but not productivity of a monoclonal antibody in hybridoma cultures.  
663 *Biotechnology and Bioengineering*, 88(2), 176–188. <https://doi.org/10.1002/bit.20232>
- 664 Severn, C. E., Eissa, A. M., Langford, C. R., Parker, A., Walker, M., Dobbe, J. G. G., Streekstra, G. J., Cameron, N. R.,  
665 & Toye, A. M. (2019). Ex vivo culture of adult CD34+ stem cells using functional highly porous polymer  
666 scaffolds to establish biomimicry of the bone marrow niche. *Biomaterials*, 225, 119533.  
667 <https://doi.org/10.1016/j.biomaterials.2019.119533>
- 668 Severn, C. E., Macedo, H., Eagle, M. J., Rooney, P., Mantalaris, A., & Toye, A. M. (2016). Polyurethane scaffolds seeded  
669 with CD34(+) cells maintain early stem cells whilst also facilitating prolonged egress of haematopoietic  
670 progenitors. *Scientific Reports*, 6, 32149. <https://doi.org/10.1038/srep32149>
- 671 Shuler, M. L., & Kargi, F. (2002). *Bioprocess Engineering: Basic Concepts* (2nd Edition). Prentice Hall.
- 672 Singh, V. (1996). On-line measurement of oxygen uptake in cell culture using the dynamic method. *Biotechnology and*  
673 *Bioengineering*, 52(3), 443–448. [https://doi.org/10.1002/\(SICI\)1097-0290\(19961105\)52:3<443::AID-](https://doi.org/10.1002/(SICI)1097-0290(19961105)52:3<443::AID-BIT12>3.0.CO;2-K)  
674 [BIT12>3.0.CO;2-K](https://doi.org/10.1002/(SICI)1097-0290(19961105)52:3<443::AID-BIT12>3.0.CO;2-K)
- 675 Sivalingam, J., SuE, Y., Lim, Z. R., Lam, A. T. L., Lee, A. P., Lim, H. L., Chen, H. Y., Tan, H. K., Warriar, T., Hang, J.  
676 W., Nazir, N. B., Tan, A. H. M., Renia, L., Loh, Y. H., Reuveny, S., Malleret, B., & Oh, S. K. W. (2020). A  
677 Scalable Suspension Platform for Generating High-Density Cultures of Universal Red Blood Cells from Human

- 678 Induced Pluripotent Stem Cells. *Stem Cell Reports*, 16(1), 182–197.  
679 <https://doi.org/10.1016/j.stemcr.2020.11.008>
- 680 Sobolewski, P., Kandel, J., Klinger, A. L., & Eckmann, D. M. (2011). Air bubble contact with endothelial cells in vitro  
681 induces calcium influx and IP3-dependent release of calcium stores. *American Journal of Physiology - Cell*  
682 *Physiology*, 301(3), C679–C686. <https://doi.org/10.1152/ajpcell.00046.2011>
- 683 Spencer, J. A., Ferraro, F., Roussakis, E., Klein, A., Wu, J., Runnels, J. M., Zaher, W., Mortensen, L. J., Alt, C., Turcotte,  
684 R., Yusuf, R., Côté, D., Vinogradov, S. A., Scadden, D. T., & Lin, C. P. (2014). Direct measurement of local  
685 oxygen concentration in the bone marrow of live animals. *Nature*, 508(7495), 269–273.  
686 <https://doi.org/10.1038/nature13034>
- 687 Sugiura, S., Sakai, Y., Nakazawa, K., & Kanamori, T. (2011). Superior oxygen and glucose supply in perfusion cell  
688 cultures compared to static cell cultures demonstrated by simulations using the finite element method.  
689 *Biomicrofluidics*, 5(2), 022202. <https://doi.org/10.1063/1.3589910>
- 690 Sun, X., Han, X., Xu, L., Gao, M., Xu, J., Yang, R., & Liu, Z. (2017). Surface-Engineering of Red Blood Cells as Artificial  
691 Antigen Presenting Cells Promising for Cancer Immunotherapy. *Small (Weinheim an Der Bergstrasse,*  
692 *Germany)*, 13(40). <https://doi.org/10.1002/sml.201701864>
- 693 Tapia, F., Vázquez-Ramírez, D., Genzel, Y., & Reichl, U. (2016). Bioreactors for high cell density and continuous multi-  
694 stage cultivations: Options for process intensification in cell culture-based viral vaccine production. *Applied*  
695 *Microbiology and Biotechnology*, 100, 2121–2132. <https://doi.org/10.1007/s00253-015-7267-9>
- 696 Timmins, N. E., Athanasas, S., Günther, M., Buntine, P., & Nielsen, L. K. (2011). Ultra-High-Yield Manufacture of Red  
697 Blood Cells from Hematopoietic Stem Cells. *Tissue Engineering Part C: Methods*, 17(11), 1131–1137.  
698 <https://doi.org/10.1089/ten.tec.2011.0207>
- 699 Timmins, N. E., & Nielsen, L. K. (2009). Blood cell manufacture: Current methods and future challenges. *Trends in*  
700 *Biotechnology*, 27(7), 415–422. <https://doi.org/10.1016/j.tibtech.2009.03.008>
- 701 Timmins, N. E., & Nielsen, L. K. (2011). Manufactured RBC — Rivers of blood, or an oasis in the desert? *Biotechnology*  
702 *Advances*, 29(6), 661–666. <https://doi.org/10.1016/j.biotechadv.2011.05.002>
- 703 Trakarnsanga, K., Griffiths, R. E., Wilson, M. C., Blair, A., Satchwell, T. J., Meinders, M., Cogan, N., Kupzig, S., Kurita,  
704 R., Nakamura, Y., Toyé, A. M., Anstee, D. J., & Frayne, J. (2017). An immortalized adult human erythroid line  
705 facilitates sustainable and scalable generation of functional red cells. *Nature Communications*, 8, 14750.  
706 <https://doi.org/10.1038/ncomms14750>

- 707 Tribe, L. A., Briens, C. L., & Margaritis, A. (1995). Determination of the volumetric mass transfer coefficient (k(L)a)  
708 using the dynamic “gas out-gas in” method: Analysis of errors caused by dissolved oxygen probes.  
709 *Biotechnology and Bioengineering*, 46(4), 388–392. <https://doi.org/10.1002/bit.260460412>
- 710 van den Akker, E., Satchwell, T. J., Pellegrin, S., Daniels, G., & Toye, A. M. (2010). The majority of the in vitro erythroid  
711 expansion potential resides in CD34(-) cells, outweighing the contribution of CD34(+) cells and significantly  
712 increasing the erythroblast yield from peripheral blood samples. *Haematologica*, 95(9), 1594–1598.  
713 <https://doi.org/10.3324/haematol.2009.019828>
- 714 van der Windt, G. J. W., Chang, C.-H., & Pearce, E. L. (2016). Measuring bioenergetics in T cells using a Seahorse  
715 Extracellular Flux Analyzer. *Current Protocols in Immunology*, 113, 3.16B.1-3.16B.14.  
716 <https://doi.org/10.1002/0471142735.im0316bs113>
- 717 Vichinsky, E. P., Earles, A., Johnson, R. A., Hoag, M. S., Williams, A., & Lubin, B. (1990). Alloimmunization in sickle  
718 cell anemia and transfusion of racially unmatched blood. *The New England Journal of Medicine*, 322(23), 1617–  
719 1621. <https://doi.org/10.1056/NEJM199006073222301>
- 720 Vlaski, M., Lafarge, X., Chevaleyre, J., Duchez, P., Boiron, J.-M., & Ivanovic, Z. (2009). Low oxygen concentration as  
721 a general physiologic regulator of erythropoiesis beyond the EPO-related downstream tuning and a tool for the  
722 optimization of red blood cell production ex vivo. *Experimental Hematology*, 37(5), 573–584.  
723 <https://doi.org/10.1016/j.exphem.2009.01.007>
- 724 von Lindern, M., Zauner, W., Mellitzer, G., Steinlein, P., Fritsch, G., Huber, K., Löwenberg, B., & Beug, H. (1999). The  
725 glucocorticoid receptor cooperates with the erythropoietin receptor and c-Kit to enhance and sustain proliferation  
726 of erythroid progenitors in vitro. *Blood*, 94(2), 550–559.
- 727 Wagner, B. A., Venkataraman, S., & Buettner, G. R. (2011). The Rate of Oxygen Utilization by Cells. *Free Radical*  
728 *Biology & Medicine*, 51(3), 700–712. <https://doi.org/10.1016/j.freeradbiomed.2011.05.024>
- 729 Walls, P. L. L., McRae, O., Natarajan, V., Johnson, C., Antoniou, C., & Bird, J. C. (2017). Quantifying the potential for  
730 bursting bubbles to damage suspended cells. *Scientific Reports*, 7(1), 1–9. <https://doi.org/10.1038/s41598-017-14531-5>
- 731 14531-5
- 732 Walsh, C., Ovenden, N., Stride, E., & Cheema, U. (2017). Quantification of cell-bubble interactions in a 3D engineered  
733 tissue phantom. *Scientific Reports*, 7(1), 6331. <https://doi.org/10.1038/s41598-017-06678-y>

- 734 Wolfe, R. P., & Ahsan, T. (2013). Shear stress during early embryonic stem cell differentiation promotes hematopoietic  
735 and endothelial phenotypes. *Biotechnology and Bioengineering*, *110*(4), 1231–1242.  
736 <https://doi.org/10.1002/bit.24782>
- 737 World Health Organization. (2021). *Guidance on centralization of blood donation testing and processing*. World Health  
738 Organization. <https://apps.who.int/iris/handle/10665/340182>
- 739 Wu, S.-C. (1999). Influence of hydrodynamic shear stress on microcarrier-attached cell growth: Cell line dependency and  
740 surfactant protection. *Bioprocess Engineering*, *21*(3), 201–206. <https://doi.org/10.1007/s004490050663>
- 741 Xing, Z., Kenty, B. M., Li, Z. J., & Lee, S. S. (2009). Scale-up analysis for a CHO cell culture process in large-scale  
742 bioreactors. *Biotechnology and Bioengineering*, *103*(4), 733–746. <https://doi.org/10.1002/bit.22287>
- 743 Yu, P. (2012). Numerical simulation on oxygen transfer in a porous scaffold for animal cell culture. *International Journal*  
744 *of Heat and Mass Transfer*, *55*(15), 4043–4052. <https://doi.org/10.1016/j.ijheatmasstransfer.2012.03.046>
- 745 Zhang, X., Luo, M., Dastagir, S. R., Nixon, M., Khamhoung, A., Schmidt, A., Lee, A., Subbiah, N., McLaughlin, D. C.,  
746 Moore, C. L., Gribble, M., Bayhi, N., Amin, V., Pepi, R., Pawar, S., Lyford, T. J., Soman, V., Mellen, J.,  
747 Carpenter, C. L., ... Chen, T. F. (2021). Engineered red blood cells as an off-the-shelf allogeneic anti-tumor  
748 therapeutic. *Nature Communications*, *12*(1), 2637. <https://doi.org/10.1038/s41467-021-22898-3>
- 749 Zhang, Y., Wang, C., Wang, L., Shen, B., Guan, X., Tian, J., Ren, Z., Ding, X., Ma, Y., Dai, W., & Jiang, Y. (2017).  
750 Large-Scale Ex Vivo Generation of Human Red Blood Cells from Cord Blood CD34+ Cells. *Stem Cells*  
751 *Translational Medicine*, *6*(8), 1698–1709. <https://doi.org/10.1002/sctm.17-0057>
- 752

## 753 **Figure legends**

754 **Figure 1. Oxygen can be limiting for erythroblast proliferation in stirred tank bioreactors when headspace**  
755 **aeration is used as sole O<sub>2</sub> source. A-C:** Erythroblasts were expanded from PBMCs for 9 days, and subsequently seeded  
756 in culture dishes (orange line) or in a 1.5 L STR (working volume: 1 L; stirring speed: 50 rpm; marine down-pumping  
757 impeller, diameter: 4.5 cm; 37°C), in which oxygen was provided by gas flow (air + 5% CO<sub>2</sub>) in the headspace (0.3  
758 L/min; purple line, no sparging), or by intermittent sparging triggered at <40% dissolved oxygen (dO<sub>2</sub>: % of the oxygen  
759 saturation concentration at the culture conditions; blue line), while pH (~7.20) was maintained by bicarbonate-buffered  
760 medium in equilibrium with the headspace gas. **(A)** Dissolved oxygen concentration in the culture was measured  
761 continuously. **(B)** Erythroblast cell concentration was monitored daily, with medium refreshment if the measured cell  
762 concentration was >1.2×10<sup>6</sup> cells/mL. Fold change (FC) in cell number was calculated relative to the number of  
763 erythroblasts at the start of culture. **(C)** Culture viability was determined using a trypan blue dye exclusion method. Panels  
764 A-E show data for a representative reactor run. D-F: To determine the oxygen requirements of proliferating erythroblasts,  
765 day 9 cells were inoculated in 0.5 L STRs (working volume: 300 mL; stirring speed: 200 rpm; marine down-pumping  
766 impeller, diameter: 2.8 cm), with a headspace flow of 100 mL/min (air + 5% CO<sub>2</sub>) as only source of oxygen for the  
767 culture. **(D)** A constant growth rate was fitted for each time interval between consecutive medium refreshment events.  
768 **(E)** The drop of dissolved oxygen after each medium refreshment was used to estimate the cell-specific oxygen  
769 consumption rate (q<sub>O<sub>2</sub></sub>) for each time interval, using the experimentally determined mass transfer coefficient (k<sub>L</sub>a) of 0.82  
770 1/h (see Supplemental Methods). **(F)** The average cell-specific oxygen consumption rate, q<sub>O<sub>2</sub></sub>, during erythroblast  
771 expansion was calculated as the mean of at 5 independent bioreactor runs (time intervals for which the q<sub>O<sub>2</sub></sub> was calculated  
772 for each run available in Supplemental Figure S1).



773 **Figure 2. Efficient expansion of erythroblasts can be achieved in stirred tank bioreactors.** Erythroblasts were  
774 expanded from PBMCs for 9 days, and subsequently seeded in culture dishes (orange lines) or STRs (blue lines) at a  
775 starting cell concentration of  $0.7 \times 10^6$  cells/mL. STRs were run with a constant N<sub>2</sub> headspace flow to fully control dO<sub>2</sub>  
776 and pH. **(A)** Cells were cultured using a sequential batch feeding strategy: medium was refreshed when the cell  
777 concentration (measured daily) was  $>1.2 \times 10^6$  cells/mL. **(B)** Cell concentration during 10 days of expansion (fold change  
778 (FC) compared to start of the culture). **(C-E)** Cells were stained with propidium iodide (PI; the percentage of PI<sup>-</sup> cells  
779 indicate the % of viable cells) **(C)**, and with CD235a plus CD71 **(D)**, or CD235a plus CD49d **(E)** (gating strategy available  
780 in Supplemental Figure S3). **(F)** Mean cell diameter (of cells  $>5 \mu\text{m}$ ) was measured daily. **(G)** Cytospin cell morphology  
781 by May-Grünwald-Giemsa (Pappenheim) staining of cultures after 10 days of expansion. All data is displayed as mean  $\pm$   
782 SD (error bars; n=3 reactor runs / donors). Significance is shown for the comparison with dish cultures (unpaired two-  
783 tailed two-sample equal-variance Student's *t*-test; \* $P < 0.05$ , \*\* $P < 0.01$ , \*\*\* $P < 0.001$ , not displayed if difference is not  
784 significant).

785 **Figure 3. Low dissolved oxygen concentration support erythroblast expansion.** Erythroblasts were expanded from  
786 PBMCs for 9 days, and subsequently seeded in culture dishes (orange line) or STRs (100 mL/min N<sub>2</sub> headspace flow) at  
787 a starting cell concentration of  $0.7 \times 10^6$  cells/mL. Dissolved oxygen was controlled by air sparging when below the  
788 targeted setpoint (10% (purple line) or 40% (blue line), equivalent to 0.72 and 2.88 mg O<sub>2</sub>/L respectively), and by stripping  
789 of excess oxygen using 100 mL/min N<sub>2</sub> headspace flow. **(A)** Cell concentration monitored for 8 days of culture, with  
790 medium refreshment when the measured cell concentration (daily) was  $>1.2 \times 10^6$  cells/mL. Fold change (FC) in cell  
791 number was calculated using the number of erythroblasts at the start of culture. **(B)** Growth rate was calculated for each  
792 day using the total biomass concentration ( $\mu\text{m}^3$  of total cell volume per mL of culture) assuming exponential growth  
793 between consecutive media refreshment events. **(C)** Mean cell diameter was measured daily. **(D-E)** Cells were stained  
794 with CD235a plus CD71 **(D)**, or CD235a plus CD49d **(E)**. **(F)** Cell-specific lactate production rate ( $q_{\text{lac,vol}}$ ) calculated  
795 using growth rate data and measured extracellular lactate concentrations (see Supplemental Methods). All data is  
796 displayed as mean  $\pm$  SD (error bars; n=3 reactor runs / donors, unless indicated otherwise). Significance is shown for the  
797 comparison with dish cultures (unpaired two-tailed two-sample equal-variance Student's *t*-test; \* $P < 0.05$ , \*\* $P < 0.01$ ,  
798 \*\*\* $P < 0.001$ , not displayed if difference is not significant). Growth rates and  $q_{\text{lac}}$  calculated using cell counts available in  
799 Supplemental Figure S4.

800 **Figure 4. High stirring speeds can sustain erythroblast expansion.** Erythroblasts were expanded from PBMCs for 9  
801 days, and subsequently seeded in culture dishes (orange line) or STRs (dO<sub>2</sub>: 40% controlled by sparging of air; 100  
802 mL/min N<sub>2</sub> headspace flow) at a starting cell concentration of 0.7×10<sup>6</sup> cells/mL, under agitation at 200 (blue line), 600  
803 (purple line) or 1800 rpm (yellow line). **(A)** Cells were maintained between 0.7 and 1.5×10<sup>6</sup> cells/mL by dilution with  
804 fresh medium. Cumulative cell numbers were calculated and represented as fold change (FC) compared to the start of the  
805 experiment. **(B)** Growth rate for each day was calculated assuming exponential growth between consecutive media  
806 refreshment events. **(C)** Cells were stained with CD235a plus CD49d to evaluate the progression of spontaneous  
807 differentiation during culture. All data is displayed as mean ± SD (error bars; n=3 reactor runs / donors, unless indicated  
808 otherwise). Significance is shown for the comparison with dish cultures (unpaired two-tailed two-sample equal-variance  
809 Student's *t*-test; \**P*<0.05, \*\**P*<0.01, \*\*\**P*<0.001, not displayed if difference is not significant).

810 **Figure 5. Erythroblast differentiation can be achieved in stirred tank bioreactors.** Erythroblasts were expanded from  
811 PBMCs for 10 days, and subsequently seeded in differentiation medium at a starting cell concentration of  $1 \times 10^6$  cells/mL.  
812 **(A)** Cells were transferred to culture dishes or STRs and kept in culture for 11 subsequent days without medium  
813 refreshment. **(B)** Cell concentration during 11 days of differentiation in STRs (blue symbols) and dishes (orange symbols).  
814 **(C)** Mean cell diameter was measured daily. **(D-E)** Cells were stained with CD235a plus CD49d **(D)**, or CD235a plus  
815 CD71 **(E)**, and percentages in each quadrant are shown. **(F)** Enucleation percentage of erythroid cells was calculated from  
816 the forward scatter and DRAQ5 staining. DRAQ5<sup>-</sup> cell numbers (reticulocytes, R) were divided by the sum of small  
817 DRAQ5<sup>+</sup> events (nuclei, N + reticulocytes, R). **(G)** Hemoglobin was measured in arbitrary units (a.u.) and the intracellular  
818 hemoglobin concentration was calculated using the total cell volume. **(H)** Representative cytopsin cell morphology by  
819 May-Grünwald-Giemsa (Pappenheim) staining of bioreactor cultures during differentiation. All data is displayed as mean  
820  $\pm$  SD (error bars; n=3 reactor runs / donors). Significance is shown for the comparison with dish cultures (unpaired two-  
821 tailed two-sample equal-variance Student's *t*-test; \* $P < 0.05$ , \*\* $P < 0.01$ , \*\*\* $P < 0.001$ , not displayed if difference is not  
822 significant).

823 **Figure 6. Scale-up of erythroblast expansion to 3 L stirred tank bioreactors.** Erythroblasts were expanded from  
824 PBMCs for 8 days, and subsequently seeded in culture dishes or 0.5 L stirred tank bioreactors (starting volume: 100-200  
825 mL) at a starting cell concentration of  $0.7 \times 10^6$  cells/mL. **(A)** Cells were kept in culture following a fed batch feeding  
826 strategy in which medium was refreshed if the measured cell concentration (daily) was  $>1.2 \times 10^6$  cells/mL. Upon reaching  
827 a total number of  $>400$  million cells, the culture was transferred to a 3.0 L bioreactor (starting volume: 800 mL; 115 rpm  
828 with marine down-pumping impeller, diameter: 5.0 cm), which was progressively filled by daily medium additions. **(B)**  
829 Culture volume in the bioreactor for an exemplary run. Transition from the 0.5 L to the 3 L reactor was performed at day  
830 3 of culture (red arrow). Upon filling of the 3 L reactor (blue arrow), excess cells were harvested daily to keep a working  
831 volume of 2.5-2.7 L. **(C)** Erythroblast cell concentration was monitored for 9 days of culture. Fold change (FC) in cell  
832 number was calculated relative to erythroblast numbers at the start of culture. The same preculture was seeded in parallel  
833 in the STR and in a dish. **(D-E)** Cells were stained with AnnexinV (apoptosis staining) and DRAQ7 (cell impermeable  
834 DNA stain) **(D)**, or CD235a plus CD49d (erythroid differentiation markers). Percentage of cells in each quadrant is  
835 included. **(E)**. All data is displayed as mean  $\pm$  SD (error bars; n=3 reactor runs / donors).

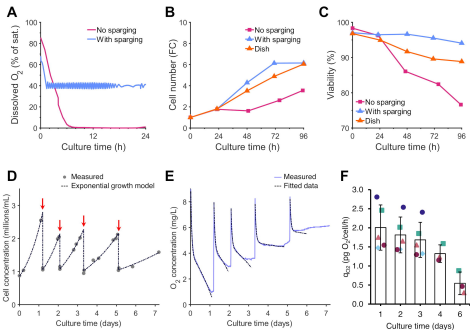

**Figure 1. Oxygen can be limiting for erythroblast proliferation in stirred tank bioreactors when headspace aeration is used as sole  $O_2$  source.** A-C: Erythroblasts were expanded from PBMCs for 9 days, and subsequently seeded in culture dishes (orange line) or in a 1.5 L STR (working volume: 1 L; stirring speed: 50 rpm; marine down-pumping impeller, diameter: 4.5 cm; 37°C), in which oxygen was provided by gas flow (air + 5%  $CO_2$ ) in the headspace (0.3 L/min; purple line, no sparging), or by intermittent sparging triggered at <40% dissolved oxygen ( $dO_2$ : % of the oxygen saturation concentration at the culture conditions; blue line), while pH (~7.20) was maintained by bicarbonate-buffered medium in equilibrium with the headspace gas. (A) Dissolved oxygen concentration in the culture was measured continuously. (B) Erythroblast cell concentration was monitored daily, with medium refreshment if the measured cell concentration was  $>1.2 \times 10^6$  cells/mL. Fold change (FC) in cell number was calculated relative to the number of erythroblasts at the start of culture. (C) Culture viability was determined using a trypan blue dye exclusion method. Panels A-E show data for a representative reactor run. D-F: To determine the oxygen requirements of proliferating erythroblasts, day 9 cells were inoculated in 0.5 L STRs (working volume: 300 mL; stirring speed: 200 rpm; marine down-pumping impeller, diameter: 2.8 cm), with a headspace flow of 100 mL/min (air + 5%  $CO_2$ ) as only source of oxygen for the culture. (D) A constant growth rate was fitted for each time interval between consecutive medium refreshment events. (E) The drop of dissolved oxygen after each medium refreshment was used to estimate the cell-specific oxygen consumption rate ( $q_{O_2}$ ) for each time interval, using the experimentally determined mass transfer coefficient ( $k_{La}$ ) of 0.82 1/h (see Supplemental Methods). (F) The average cell-specific oxygen consumption rate,  $q_{O_2}$ , during erythroblast expansion was calculated as the mean of 5 independent bioreactor runs (time intervals for which the  $q_{O_2}$  was calculated for each run available in Supplemental Figure S1).

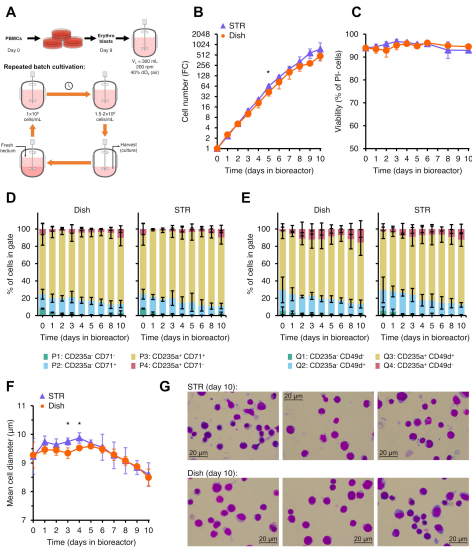

**Figure 2. Efficient expansion of erythroblasts can be achieved in stirred tank bioreactors.** Erythroblasts were expanded from PBMCs for 9 days, and subsequently seeded in culture dishes (orange lines) or STRs (blue lines) at a starting cell concentration of  $0.7 \times 10^6$  cells/mL. STRs were run with a constant  $N_2$  headspace flow to fully control  $dO_2$  and pH. **(A)** Cells were cultured using a sequential batch feeding strategy: medium was refreshed when the cell concentration (measured daily) was  $>1.2 \times 10^6$  cells/mL. **(B)** Cell concentration during 10 days of expansion (fold change (FC) compared to start of the culture). **(C-E)** Cells were stained with propidium iodide (PI; the percentage of PI<sup>+</sup> cells indicate the % of viable cells) **(C)**, and with CD235a plus CD71 **(D)**, or CD235a plus CD49d **(E)** (gating strategy available in Supplemental Figure S3). **(F)** Mean cell diameter (of cells  $>5 \mu m$ ) was measured daily. **(G)** Cytospin cell morphology by May-Grünwald-Giemsa (Pappenheim) staining of cultures after 10 days of expansion. All data is displayed as mean  $\pm$  SD (error bars;  $n=3$  reactor runs / donors). Significance is shown for the comparison with dish cultures (unpaired two-tailed two-sample equal-variance Student's *t*-test; \* $P < 0.05$ , \*\* $P < 0.01$ , \*\*\* $P < 0.001$ , not displayed if difference is not significant).

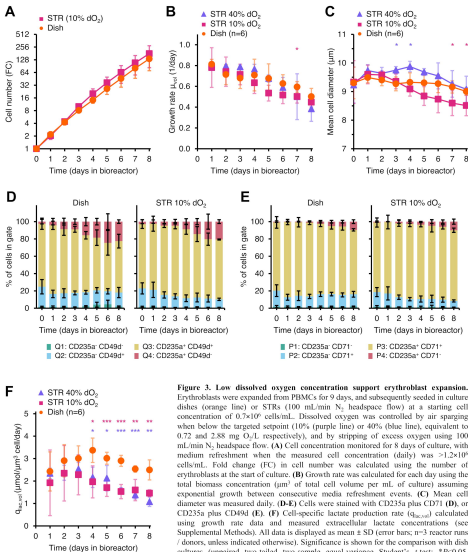

**Figure 3. Low dissolved oxygen concentration support erythroblast expansion.** Erythroblasts were expanded from PBMCs for 9 days, and subsequently seeded in culture dishes (orange line) or STRs (100 mL/min N<sub>2</sub> headspace flow) at a starting cell concentration of  $0.7 \times 10^6$  cells/mL. Dissolved oxygen was controlled by air sparging when below the targeted setpoint (10% (purple line) or 40% (blue line), equivalent to 0.72 and 2.88 mg O<sub>2</sub>/L respectively), and by stripping of excess oxygen using 100 mL/min N<sub>2</sub> headspace flow. (A) Cell concentration monitored for 8 days of culture, with medium refreshment when the measured cell concentration (daily) was  $>1.2 \times 10^6$  cells/mL. Fold change (FC) in cell number was calculated using the number of erythroblasts at the start of culture. (B) Growth rate was calculated for each day using the total biomass concentration ( $\mu\text{m}^3$  of total cell volume per mL of culture) assuming exponential growth between consecutive media refreshment events. (C) Mean cell diameter was measured daily. (D-E) Cells were stained with CD235a plus CD71 (D), or CD235a plus CD49d (E). (F) Cell-specific lactate production rate ( $q_{lac,vol}$ ) calculated using growth rate data and measured extracellular lactate concentrations (see Supplemental Methods). All data is displayed as mean  $\pm$  SD (error bars; n=3 reactor runs / donors, unless indicated otherwise). Significance is shown for the comparison with dish cultures (unpaired two-tailed two-sample equal-variance Student's *t*-test; \**P*<0.05, \*\**P*<0.01, \*\*\**P*<0.001, not displayed if difference is not significant). Growth rates and  $q_{lac}$  calculated using cell counts available in Supplemental Figure S4.



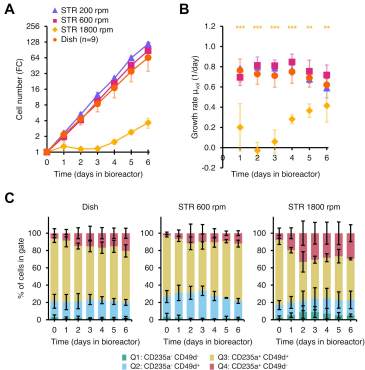

**Figure 4. High stirring speeds can sustain erythroblast expansion.** Erythroblasts were expanded from PBMCs for 9 days, and subsequently seeded in culture dishes (orange line) or STRs ( $dO_2$ : 40% controlled by sparging of air; 100 mL/min  $N_2$  headspace flow) at a starting cell concentration of  $0.7 \times 10^6$  cells/mL, under agitation at 200 (blue line), 600 (purple line) or 1800 rpm (yellow line). **(A)** Cells were maintained between 0.7 and  $1.5 \times 10^6$  cells/mL by dilution with fresh medium. Cumulative cell numbers were calculated and represented as fold change (FC) compared to the start of the experiment. **(B)** Growth rate for each day was calculated assuming exponential growth between consecutive media refreshment events. **(C)** Cells were stained with CD235a plus CD49d to evaluate the progression of spontaneous differentiation during culture. All data is displayed as mean  $\pm$  SD (error bars; n=3 reactor runs / donors, unless indicated otherwise). Significance is shown for the comparison with dish cultures (unpaired two-tailed two-sample equal-variance Student's *t*-test; \* $P < 0.05$ , \*\* $P < 0.01$ , \*\*\* $P < 0.001$ , not displayed if difference is not significant).

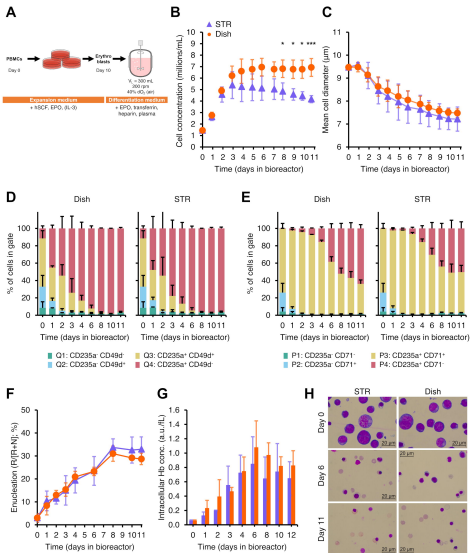

**Figure 5. Erythroblast differentiation can be achieved in stirred tank bioreactors.** Erythroblasts were expanded from PBMCs for 10 days, and subsequently seeded in differentiation medium at a starting cell concentration of  $1 \times 10^6$  cells/mL. **(A)** Cells were transferred to culture dishes or STRs and kept in culture for 11 subsequent days without medium refreshment. **(B)** Cell concentration during 11 days of differentiation in STRs (blue symbols) and dishes (orange symbols). **(C)** Mean cell diameter was measured daily. **(D-E)** Cells were stained with CD235a plus CD49d **(D)**, or CD235a plus CD71 **(E)**, and percentages in each quadrant are shown. **(F)** Enucleation percentage of erythroid cells was calculated from the forward scatter and DRAQ5 staining. DRAQ5<sup>+</sup> cell numbers (reticulocytes, R) were divided by the sum of small DRAQ5<sup>+</sup> events (nuclei, N + reticulocytes, R). **(G)** Hemoglobin was measured in arbitrary units (a.u.) and the intracellular hemoglobin concentration was calculated using the total cell volume. **(H)** Representative cytoplasmic cell morphology by May-Grünwald-Giemsa (Pappenheim) staining of bioreactor cultures during differentiation. All data is displayed as mean  $\pm$  SD (error bars;  $n=3$  reactor runs / donors). Significance is shown for the comparison with dish cultures (unpaired two-tailed two-sample equal-variance Student's *t*-test; \* $P < 0.05$ , \*\* $P < 0.01$ , \*\*\* $P < 0.001$ , not displayed if difference is not significant).

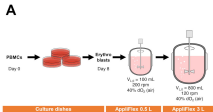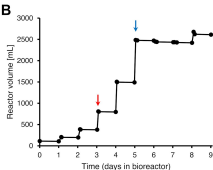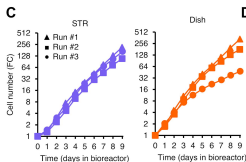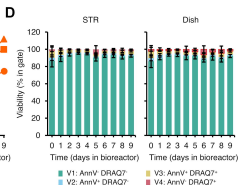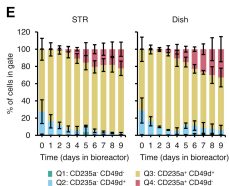

**Figure 6. Scale-up of erythroblast expansion to 3 L stirred tank bioreactors.** Erythroblasts were expanded from PBMCs for 8 days, and subsequently seeded in culture dishes or 0.5 L stirred tank bioreactors (starting volume: 100-200 mL) at a starting cell concentration of  $0.7 \times 10^5$  cells/mL. (A) Cells were kept in culture following a fed batch feeding strategy in which medium was refreshed if the measured cell concentration (daily) was  $>1.2 \times 10^6$  cells/mL. Upon reaching a total number of  $>400$  million cells, the culture was transferred to a 3.0 L bioreactor (starting volume: 800 mL; 115 rpm with marine down-pumping impeller, diameter: 5.0 cm), which was progressively filled by daily medium additions. (B) Culture volume in the bioreactor for an exemplary run. Transition from the 0.5 L to the 3 L reactor was performed at day 3 of culture (red arrow). Upon filling of the 3 L reactor (blue arrow), excess cells were harvested daily to keep a working volume of 2.5-2.7 L. (C) Erythroblast cell concentration was monitored for 9 days of culture. Fold change (FC) in cell number was calculated relative to erythroblast numbers at the start of culture. The same preculture was seeded in parallel in the STR and in a dish. (D-E) Cells were stained with AnnexinV (apoptosis staining) and DRAQ7 (cell impermeable DNA stain) (D), or CD235a plus CD49d (erythroid differentiation markers). Percentage of cells in each quadrant is included. (E). All data is displayed as mean  $\pm$  SD (error bars; n=3 reactor runs / donors).
